# Supplementary material for: Exogenous cystine increases susceptibility of drug-resistant Salmonella to gentamicin by promoting oxidation of glutathione metabolism and imbalance of intracellular redox levels
Source: Front Microbiol. 2025 Feb 7;16:1527480. doi: 10.3389/fmicb.2025.1527480 (PMC11843173; doi:10.3389/fmicb.2025.1527480)
Supplement: Supplementary file 2 [file Table_2.XLSX]

## Sheet: Sheet1
Name	Formula	Molecular Weight	RT [min]	m/z
PLK	C17 H32 N4 O4	178.121	5.064	179.128
Limonin	C26 H30 O8	452.181	7.138	453.188
2-[(7-methyl-2,3-dihydro-1H-inden-4-yl)oxy]pyridin-3-amine	C15 H16 N2 O	240.126	6.835	241.133
UDP	C9 H14 N2 O12 P2	404.002	4.697	405.009
Choline bitartrate	C9 H19 N O7	253.117	1.985	254.124
1-Stearoylglycerol	C21 H42 O4	358.308	10.635	359.315
4'-Methoxyflavone	C16 H12 O3	252.078	1.406	253.085
Astaxanthin	C40 H52 O4	1192.76	9.228	597.389
2,5-Furandicarboxylic acid	C6 H4 O5	156.006	7.578	139.002
PE 16:0_17:2	C38 H72 N O8 P	701.499	10.779	702.507
N-cyclohexyl-2-(3-methyl-5-isoxazolyl)benzamide	C17 H20 N2 O2	284.154	5.498	569.315
Palmitic Acid	C16 H32 O2	273.266	6.584	274.274
Dimethyl succinate	C6 H10 O4	146.058	5.117	147.065
3-hydroxy-1,5-diphenylpentan-1-one	C17 H18 O2	276.111	5.228	277.118
Nonadecanoic acid	C19 H38 O2	298.287	10.632	299.294
2,2,5,5-tetramethyl-2,5-dihydro-1H-pyrrole-3-carboxamide	C9 H16 N2 O	168.126	4.844	169.134
Cystamine	C4 H12 N2 S2	152.045	5.445	153.052
4-(cyclohexylmethyl)-6-(2-thienyl)-2,3-dihydropyridazin-3-one hydrate	C15 H18 N2 O S	592.191	5.502	297.103
Cer 9:1;2O/2:0	C11 H21 N O3	215.152	5.443	216.159
D-Panthenol	C9 H19 N O4	227.116	3.502	228.123
Pyridoxine	C8 H11 N O3	169.074	2.199	170.081
4-Aminobutyric acid	C4 H9 N O2	103.063	1.404	104.071
L-Homocystine	C8 H16 N2 O4 S2	268.056	5.324	269.063
1,3-dimethyl-6-(trifluoromethyl)-1H-pyrazolo[3,4-b]pyridin-4-ol	C9 H8 F3 N3 O	253.044	3.595	254.051
tert-Butyl N-[1-(aminocarbonyl)-3-methylbutyl]carbamate	C11 H22 N2 O3	230.163	5.223	231.17
1,6-Hexanediol diacrylate	C12 H18 O4	226.118	6.474	227.125
N-cyclohexyl-N-methyl-6-quinoxalinecarboxamide	C16 H19 N3 O	291.134	7.413	292.142
Oleoyl ethylamide	C20 H39 N O	309.303	7.804	310.31
Ala-Ile	C9 H18 N2 O3	185.105	5.32	203.139
methyl 1-methyl-1,2,5,6-tetrahydropyridine-3-carboxylate hydrobromide	C8 H13 N O2	155.095	4.891	156.102
D-Sorbitol 6-phosphate	C6 H15 O9 P	262.045	2.59	263.052
(2R)-2-[(2R,5S)-5-[(2S)-2-hydroxybutyl]oxolan-2-yl]propanoic acid	C11 H20 O4	198.123	6.101	199.131
(2E)-6-hydroxy-2-methyl-6-(4-methylphenyl)hept-2-enoic acid	C15 H20 O3	230.128	6.437	231.135
5'-S-Methyl-5'-thioadenosine	C11 H15 N5 O3 S	297.089	5.245	298.097
Tyramine	C8 H11 N O	137.084	6.027	138.091
3-(4-hydroxy-3-methoxyphenyl)propanoic acid	C10 H12 O4	178.063	5.005	196.097
PG 16:0_16:1	C38 H73 O10 P	737.525	11.781	738.532
Palmitoleic Acid	C16 H30 O2	276.206	7.625	277.213
LPE 14:1	C19 H38 N O7 P	423.238	7.848	424.245
N-Acetyl-D-galactosamine	C8 H15 N O6	221.09	1.411	222.097
ethyl 4-[(6-methyl-3-pyridazinyl)oxy]benzoate	C14 H14 N2 O3	258.1	5.489	259.107
2-Methoxybenzaldehyde	C8 H8 O2	136.05	1.245	137.057
Purine	C5 H4 N4	120.044	2.642	138.077
L-Cysteine-glutathione gisulfide	C13 H22 N4 O8 S2	426.088	1.426	427.095
Phenylglyoxylic acid	C8 H6 O3	150.032	5.438	168.065
Adiphenine	C20 H25 N O2	311.184	2.764	156.6
PE 16:0_16:1	C37 H72 N O8 P	689.498	11.039	690.505
N-P-Coumaroyl Spermidine	C16 H25 N3 O2	291.195	3.275	146.605
Piperine	C17 H19 N O3	285.132	1.538	286.139
7-Methylxanthine	C6 H6 N4 O2	166.051	1.147	167.058
Erythrono-1,4-lactone	C4 H6 O4	118.027	2.6	141.016
1-(4-Methoxyphenyl)-2-propanone	C10 H12 O2	164.084	5.643	165.091
Phenytoin	C15 H12 N2 O2	274.068	4.568	275.075
Emetine	C29 H40 N2 O4	960.597	8.345	481.306
N-(4-butyl-2-methylphenyl)-N'-[4-(4-methylpiperazino)phenyl]urea	C23 H32 N4 O	380.254	7.278	381.261
APK	C14 H26 N4 O4	336.175	10.533	337.182
Azetidine-2-carboxylic acid	C4 H7 N O2	101.048	1.425	102.055
L-Dihydroorotic Acid	C5 H6 N2 O4	158.033	3.97	339.055
Stearoyl Ethanolamide	C20 H41 N O2	327.313	7.779	328.321
8-Aminooctanoic acid	C8 H17 N O2	159.126	5.404	160.133
Ethyl protocatechuate	C9 H10 O4	182.058	5.576	183.065
2-[3-(trifluoromethyl)-1H-pyrazol-1-yl]-4H-chromen-4-one	C13 H7 F3 N2 O2	280.047	1.312	281.054
7-(2-hydroxypropan-2-yl)-1,4a-dimethyl-decahydronaphthalen-1-ol	C15 H28 O2	257.235	6.173	258.243
L-Glutamate	C5 H9 N O4	147.053	2.589	148.06
PE 11:0_13:1	C29 H56 N O8 P	577.374	10.748	578.381
6-Deoxy-D-glucose	C6 H12 O5	164.068	1.465	187.057
Methyl nicotinate	C7 H7 N O2	137.048	5.534	138.055
Propionyl-L-carnitine	C10 H19 N O4	217.131	4.01	218.139
N-(2,4-Dimethylphenyl)formamide	C9 H11 N O	149.084	6.316	150.091
17beta-Trenbolone	C18 H22 O2	270.159	6.969	271.166
Inosine	C10 H12 N4 O5	268.08	3.398	269.088
N-Formylkynurenine	C11 H12 N2 O4	236.079	3.689	237.087
Guanosine monophosphate	C10 H14 N5 O8 P	363.058	1.522	364.065
1-Methyladenosine	C11 H15 N5 O4	281.112	4.744	282.12
isoleucine	C6 H13 N O2	131.095	3.773	132.102
N-α-L-Acetyl-arginine	C8 H16 N4 O3	216.122	1.679	217.129
1-allyl-4,5-diphenyl-2-(2-thienyl)-1H-imidazole	C22 H18 N2 S	320.14	6.795	321.147
N1-(2,3-dihydro-1,4-benzodioxin-2-ylmethyl)-2,2-dimethylpropanamide	C14 H19 N O3	249.134	6.152	250.141
3-Methyladipic acid	C7 H12 O4	160.073	1.62	178.107
Stercobilin	C33 H46 N4 O6	594.34	9.484	595.347
4-(2-furyl)-6-(methylthio)-2-pyrazin-2-ylpyrimidine-5-carbonitrile	C14 H9 N5 O S	295.055	5.157	296.062
N-Acetyl-DL-valine	C7 H13 N O3	159.09	5.348	160.097
L-Phenylalanine	C9 H11 N O2	165.079	4.926	166.086
5,7-dimethyl-2-phenylpyrazolo[1,5-a]pyrimidine	C14 H13 N3	261.067	5.646	284.056
5-Hydroxymethyluracil	C5 H6 N2 O3	142.038	4.656	307.065
N6-Acetyl-L-lysine	C8 H16 N2 O3	188.116	1.508	189.123
PC O-18:2	C26 H50 N O7 P	519.332	8.783	520.339
beta-Nicotinamide adenine dinucleotide phosphate	C21 H28 N7 O17 P3	743.076	4.427	372.545
Stearic acid	C18 H36 O2	284.271	10.63	267.268
alpha-Benzylsuccinic acid	C11 H12 O4	208.073	6.108	231.063
Cytidine	C9 H13 N3 O5	243.085	1.642	244.093
2-Arachidonoyl glycerol	C23 H38 O4	378.274	9.996	379.282
WMH	C22 H28 N6 O4 S	472.191	5.693	473.199
Dl-Lanthionine	C6 H12 N2 O4 S	208.052	5.546	209.059
Alternariol	C14 H10 O5	258.05	5.659	259.058
Acetyl-Coenzyme A	C23 H38 N7 O17 P3 S	809.124	5.488	810.131
WKK	C23 H36 N6 O4	230.136	5.012	231.144
gamma-Glutamylcysteine	C8 H14 N2 O5 S	250.062	3.305	233.059
6-Aminonicotinamide	C6 H7 N3 O	137.059	5.46	138.066
4-Amino-5-imidazolecarboxamide	C4 H6 N4 O	126.054	1.835	110.035
3-(3,4,5-trimethoxyphenyl)propanoic acid	C12 H16 O5	222.087	5.317	223.094
3-Methylcrotonylglycine	C7 H11 N O3	157.074	5.286	158.081
LPC 22:6-SN1	C30 H50 N O7 P	567.333	8.838	568.34
3,4-dihydro-2H,6H-[1,3]thiazino[2,3-b]quinazolin-6-one	C11 H10 N2 O S	218.048	0.516	219.054
FRH	C21 H30 N8 O4	458.241	10.879	459.248
LPC 18:2-SN1	C26 H50 N O7 P	519.332	8.991	520.34
5-Methyluridine	C10 H14 N2 O6	258.085	1.519	276.119
Ala-trp	C14 H17 N3 O3	275.128	5.257	314.091
Deoxyadenosine	C10 H13 N5 O3	251.102	5.437	252.109
N2-phenyl-4-(piperidinomethyl)-1,3-thiazol-2-amine	C15 H19 N3 S	273.131	6.089	274.139
Taurocholic acid	C26 H45 N O7 S	515.292	5.418	516.3
N-(p-Coumaroyl) serotonin	C19 H18 N2 O3	644.266	5.865	645.273
VLH	C17 H29 N5 O4	778.398	5.056	390.206
Etiocholanolone	C19 H30 O2	602.426	10.255	603.433
3-[(4-chlorophenyl)thio]-1-phenylprop-2-en-1-one	C15 H11 Cl O S	295.996	5.551	297.003
11β-Hydroxyandrosterone	C19 H30 O3	323.246	7.631	346.235
Lysops 22:5	C28 H46 N O9 P	571.291	8.967	572.298
3-[(4-hydroxyphenyl)methyl]-octahydropyrrolo[1,2-a]pyrazine-1,4-dione	C14 H16 N2 O3	260.119	4.826	299.081
mesaconic acid	C5 H6 O4	130.027	1.925	131.034
2-[(3S)-1-(3,4-Difluorobenzyl)-3-pyrrolidinyl]-1,3-benzoxazole	C18 H16 F2 N2 O	314.124	1.189	315.131
N-(2-morpholinophenyl)-5-(phenylsulfonyl)-2-thiophenesulfonamide	C20 H20 N2 O5 S3	486.026	1.419	487.033
N-Acetyl-aspartic acid	C6 H9 N O5	175.048	1.935	198.037
PE 8:0_8:0	C21 H42 N O8 P	467.265	7.078	468.272
LPE 18:2	C23 H44 N O7 P	477.285	7.378	478.293
4-oxo-4-(5,6,7,8-tetrahydronaphthalen-1-ylamino)but-2-enoic acid	C14 H15 N O3	263.116	5.781	246.112
PE 15:0_16:1	C36 H70 N O8 P	675.484	9.616	676.491
2-Methylbutyroylcarnitine	C12 H23 N O4	245.163	5.63	246.17
Luotonin A	C18 H11 N3 O	285.084	5.534	286.092
Dl-3-Hydroxynorvaline	C5 H11 N O3	133.074	1.394	134.081
S-Adenosylhomocysteine	C14 H20 N6 O5 S	384.121	2.568	193.068
7-(1-pyrrolidinyl)pyrimido[4,5-d]pyrimidin-4-amine	C10 H12 N6	216.111	2.291	217.118
LPH	C17 H27 N5 O4	365.206	2.984	183.61
TQH	C15 H24 N6 O6	384.169	6.065	385.176
Normeperidine	C14 H19 N O2	233.139	6.019	234.146
5 methyl THF	C20 H25 N7 O6	459.189	5.352	460.196
3,5-Dimethoxybenzoic acid	C9 H10 O4	182.055	1.302	183.063
Chlorogenic Acid Methyl Ester	C17 H20 O9	368.11	2.473	369.117
Quinoline-4-carboxylic acid	C10 H7 N O2	173.047	5.395	174.055
7-(2-thienyl)[1,2,4]triazolo[4,3-a]pyrimidine	C9 H6 N4 S	202.03	6.272	203.037
N-(5-Aminopentyl)acetamide	C7 H16 N2 O	144.126	1.928	145.133
Allantoin	C4 H6 N4 O3	158.043	1.362	355.051
Leucylproline	C11 H20 N2 O3	228.147	5.132	229.155
Palmitoylethanolamide	C18 H37 N O2	299.282	9.583	300.289
LPC 20:4-SN1	C28 H50 N O7 P	543.332	8.916	544.339
Pyridoxal	C8 H9 N O3	167.058	5.43	168.065
Pyridoxamine 5-phosphate	C8 H13 N2 O5 P	248.056	1.382	249.063
Azilsartan	C25 H20 N4 O5	438.124	5.283	439.132
Nicotinic acid mononucleotide	C11 H14 N O9 P	335.041	4.165	336.048
methyl 7-hydroxy-4-oxo-8-propyl-4H-1-benzothiine-2-carboxylate	C14 H14 O4 S	278.057	3.981	279.064
4-chloro-5-morpholino-2-quinoxalin-2-ylpyridazin-3(2H)-one	C16 H14 Cl N5 O2	343.083	1.924	344.091
2-(2-methyl-1H-indol-3-yl)acetonitrile	C11 H10 N2	170.084	5.939	171.092
PE 30:0	C35 H70 N O8 P	685.466	10.549	686.473
Stiripentol	C14 H18 O3	216.112	6.184	217.12
Biopterin	C9 H11 N5 O3	237.086	5.208	238.093
2-(2,5-dimethyl-3-thienyl)-2,3,4,5-tetrahydro-1,5-benzothiazepin-4-one	C15 H15 N O S2	306.088	5.24	307.096
N-isopropyl-N'-(2-oxoazepan-3-yl)urea	C10 H19 N3 O2	251.102	2.431	252.109
3-Methylindole	C9 H9 N	131.074	5.216	132.081
Cyclocytidine	C9 H11 N3 O4	225.076	5.716	226.084
Bz-RS-ISer(3-Ph)-Ome	C17 H17 N O4	299.114	5.228	300.122
4-Guanidinobutanoic acid	C5 H11 N3 O2	145.085	1.792	146.092
3,4,10,11-tetramethoxy-7,8,12b,13-tetrahydro-5H-6-azatetraphene	C21 H25 N O4	377.162	1.861	378.169
Dl-3-Hydroxy-kynurenine	C10 H12 N2 O4	224.079	1.502	242.113
2-{[methyl(2,3,4,5,6-pentahydroxyhexyl)amino]methylidene}malononitrile	C11 H17 N3 O5	271.116	5.993	272.123
4-[1-(dimethylamino)ethylidene]-2-phenyl-1,3-oxazol-5(4H)-one	C13 H14 N2 O2	252.086	2.94	253.093
N2-tetrahydrofuran-2-ylmethyl-4-(4-fluorophenyl)-1,3-thiazol-2-amine	C14 H15 F N2 O S	278.094	3.669	279.101
Bicyclo Prostaglandin E2	C20 H30 O4	334.212	6.733	335.219
Phenylacetylglycine	C10 H11 N O3	193.074	5.619	194.081
Cystine	C6 H12 N2 O4 S2	240.024	1.258	263.013
L-Kynurenine	C10 H12 N2 O3	208.085	2.698	247.049
Isoproterenol	C11 H17 N O3	211.121	3.558	212.128
LMH	C17 H29 N5 O4 S	191.082	5.128	400.198
5-[4-(tert-butyl)phenyl]-1,3,4-oxadiazole-2-thiol	C12 H14 N2 O S	234.078	5.684	235.085
2-(Formylamino)Benzoic Acid	C8 H7 N O3	165.043	5.407	166.05
L-Tyrosinemethylester	C10 H13 N O3	195.089	4.01	213.123
6,7,8-trimethoxy-3-phenyl-2-thioxo-1,2,3,4-tetrahydroquinazolin-4-one	C17 H16 N2 O4 S	344.08	6.341	345.087
Phenylacetylglutamine	C13 H16 N2 O4	264.111	5.028	265.118
2-Aminobenzenesulfonic acid	C6 H7 N O3 S	173.015	5.295	174.022
Ecgonine	C9 H15 N O3	185.105	1.216	186.112
gamma-Glutamylglutamine	C10 H17 N3 O6	275.111	1.514	276.119
2-[5-(2-hydroxypropyl)oxolan-2-yl]propanoic acid	C10 H18 O4	224.097	6.231	225.105
Valylproline	C10 H18 N2 O3	214.132	3.454	215.139
(1E)-5-hydroxy-1,7-diphenylhept-1-en-3-one	C19 H20 O2	302.13	5.472	303.137
UR-144 N-(2-hydroxypentyl) metabolite	C21 H29 N O2	155.095	5.415	156.102
Cadaverine	C5 H14 N2	102.116	1.16	103.123
6-O-Isobutyryl-alpha-D-glucopyranosyl alpha-D-glucopyranoside	C16 H28 O12	434.139	1.373	435.146
6-phenyl-1,2,3,4-tetrahydro-2,5-benzodiazocin-1-one	C16 H14 N2 O	232.098	5.923	233.105
PE 28:1	C33 H64 N O8 P	655.419	9.747	656.426
4-benzyl-2H-1,4-benzoxazin-3(4H)-one	C15 H13 N O2	217.108	6.238	218.115
PE 15:0_16:2	C36 H68 N O8 P	673.468	11.309	674.475
Oxytetracycline	C22 H24 N2 O9	482.126	10.287	483.133
LSD-d3	C20 H22 [2]H3 N3 O	326.213	0.541	327.22
Milbemycin A3 oxime	C31 H43 N O7	563.296	5.558	564.303
Psoralidin	C20 H16 O5	336.099	2.262	337.106
cholesteryl sulfate	C27 H46 O4 S	466.314	6.695	489.303
N6-Isopentenyladenosine	C15 H21 N5 O4	313.177	5.859	336.166
D-glutamine	C5 H10 N2 O3	146.069	3.124	129.066
TKK	C16 H33 N5 O5	375.252	6.395	376.259
1-[(3,5-dimethylisoxazol-4-yl)sulfonyl]piperidine	C10 H16 N2 O3 S	244.088	5.966	245.095
5-OxoETE	C20 H30 O3	318.217	7.907	319.224
Leukotriene B4 Ethanolamide	C22 H37 N O4	802.502	8.956	402.259
2-(14,15-Epoxyeicosatrienoyl) glycerol	C23 H38 O5	394.269	7.947	395.277
2-{[2-(4-methylpiperazino)phenyl]methylene}hydrazine-1-carbothioamide	C13 H19 N5 S	277.134	6.487	300.123
6-Hydroxymelatonin	C13 H16 N2 O3	248.114	5.679	249.121
ethyl 2-(4-oxo-4,5-dihydro-1,3-thiazol-2-yl)acetate	C7 H9 N O3 S	187.03	5.607	188.038
L-Adrenaline	C9 H13 N O3	183.09	1.509	184.097
L-threo-3-Phenylserine	C9 H11 N O3	181.074	4.944	182.081
Methyl 3-indolyacetate	C11 H11 N O2	189.078	5.526	379.162
2-Phenylethylamine	C8 H11 N	121.089	2.142	139.123
L-Valine	C5 H11 N O2	117.079	1.019	118.086
N-[1-(4-methoxy-2-oxo-2H-pyran-6-yl)-2-methylbutyl]acetamide	C13 H19 N O4	270.158	4.842	271.165
glutathione disulfide	C20 H32 N6 O12 S2	612.152	5.429	307.083
N-Acetylornithine	C7 H14 N2 O3	174.102	1.352	175.109
YQH	C20 H26 N6 O6	223.096	5.475	224.103
3-Hydroxylidocaine	C14 H22 N2 O2	250.168	5.602	251.175
Ouabain	C29 H44 O12	566.275	8.692	567.282
2-{[2-oxo-2-(3-pyridylamino)ethyl]thio}acetic acid	C9 H10 N2 O3 S	248.021	3.907	231.017
6-(7-methyloctyl)-1H,3H,4H,6H-furo[3,4-c]furan-1-one	C15 H24 O3	252.17	7.519	253.177
4-[4-(1-phenyl-1H-1,2,4-triazol-5-yl)-1,3-thiazol-2-yl]pyridine	C16 H11 N5 S	305.073	3.497	306.081
N-(2,6-Dimethylphenyl)-N-(methoxyacetyl) alanine	C14 H19 N O4	265.131	5.181	266.139
Methyldopa	C10 H13 N O4	211.084	4.836	212.092
Guggulsterone	C21 H28 O2	312.21	5.253	313.218
D-2-Aminoadipic acid	C6 H11 N O4	161.069	5.027	144.065
7-(2-aminophenyl)heptanoic acid	C13 H19 N O2	221.141	6.918	222.149
Asp-Phe	C13 H16 N2 O5	280.106	5.136	281.113
2-Phenylglycine	C8 H9 N O2	151.063	2.597	169.097
NKK	C16 H32 N6 O5	388.243	6.181	389.251
FPK	C20 H30 N4 O4	368.241	5.713	391.23
2-cyano-3-(3,4-dimethoxyphenyl)acrylic acid	C12 H11 N O4	233.066	5.943	234.073
4-methyl-5-oxo-2-pentyl-2,5-dihydrofuran-3-carboxylic acid	C11 H16 O4	212.102	6.747	195.099
Thiamine	C12 H16 N4 O S	264.104	1.432	265.112
12-oxo Phytodienoic Acid	C18 H28 O3	292.201	7.643	293.208
Paromomycin	C23 H45 N5 O14	615.301	5.357	616.309
Cyclohexylsulfamate	C6 H13 N O3 S	179.062	3.31	162.058
2-[(3S)-1-(3-Chlorobenzyl)-3-pyrrolidinyl]-5-methyl-1,3-benzoxazole	C19 H19 Cl N2 O	326.122	3.38	327.13
Glycitin	C22 H22 O10	430.147	6.054	469.11
Adenosine	C10 H13 N5 O4	267.096	3.761	268.104
LysoPE 18:0	C23 H48 N O7 P	481.318	9.925	482.326
PE 17:1_17:1	C39 H74 N O8 P	715.514	11.413	716.522
2-piperidinobenzoic acid	C12 H15 N O2	205.11	3.351	206.118
1,7-bis(3,4-dihydroxyphenyl)heptan-3-one	C19 H22 O5	330.144	6.683	331.151
L-Hydroxyproline	C5 H9 N O3	131.058	2.68	132.065
N-Acetylserotonin	C12 H14 N2 O2	218.105	5.391	219.113
L-lysine	C6 H14 N2 O2	146.106	1.382	147.113
Deoxyinosine	C10 H12 N4 O4	252.086	4.724	253.093
SPB 16:1;2O	C16 H33 N O2	271.251	6.626	272.258
N-Acetyl-Asp-Glu	C11 H16 N2 O8	304.09	2.37	305.098
3-hydroxy-N-(1-hydroxy-4-methylpentan-2-yl)-5-oxo-6-phenylhexanamide	C18 H27 N O4	321.191	6.211	322.198
PC O-18:1	C26 H52 N O7 P	521.348	9.324	522.355
N,N-dimethyl-9H-purin-6-amine	C7 H9 N5	163.086	4.878	164.093
Dl-2-Amino-3-phosphonopropionic acid	C3 H8 N O5 P	169.014	1.259	170.021
5,6-dimethyl-4-oxo-4H-pyran-2-carboxylic acid	C8 H8 O4	168.04	3.89	169.047
2-Amino-1,3-octadecanediol	C18 H39 N O2	301.298	7.122	302.305
11-dehydro Thromboxane B2	C20 H32 O6	368.217	6.588	369.225
N-[(4-hydroxy-3-methoxyphenyl)methyl]-8-methylnonanamide	C18 H29 N O3	329.195	5.137	330.202
3-Methoxytyramine	C9 H13 N O2	167.094	2.209	185.128
5-Hydroxyindole-2-carboxylic acid	C9 H7 N O3	177.042	4.96	195.076
Pyridoxal 5'-phosphate	C8 H10 N O6 P	247.024	2.491	248.032
Glycerol-3-phosphate	C3 H9 O6 P	172.014	1.584	173.021
3-(4-methoxyphenyl)-1-methyl-1H-1,2,4-triazol-5-ol	C10 H11 N3 O2	227.067	1.476	228.074
Tomatidine	C27 H45 N O2	415.342	10.913	416.35
5-(tert-butyl)-3-[(2-cyanoacetyl)amino]thiophene-2-carboxamide	C12 H15 N3 O2 S	287.068	2.866	288.075
L-Tryptophan	C11 H12 N2 O2	204.09	4.697	205.097
Biliverdin	C33 H34 N4 O6	582.247	6.42	583.255
Υ-L-Glutamyl-L-glutamic acid	C10 H16 N2 O7	276.096	1.524	277.103
L-Pyroglutamic acid	C5 H7 N O3	129.043	1.388	130.05
beta-Nicotinamide mononucleotide	C11 H15 N2 O8 P	334.057	2.614	335.064
2-Deoxyuridine	C9 H12 N2 O5	228.075	5.858	229.083
Acetylcarnitine	C9 H17 N O4	203.115	1.558	221.149
2-{[(4,5-dimethoxy-2-nitrophenethyl)imino]methyl}phenol	C17 H18 N2 O5	348.133	7.018	331.13
Methandrostenolone	C20 H28 O2	300.208	7.748	301.216
PE 17:0_18:2	C40 H76 N O8 P	729.53	10.952	730.538
S-(Methyl)Glutathione	C11 H19 N3 O6 S	321.099	3.747	322.106
Methylmalonate	C4 H6 O4	118.026	3.596	119.034
2-[3-methyl-2-(methylimino)-4-oxo-1,3-thiazolan-5-yl]acetic acid	C7 H10 N2 O3 S	202.041	3.374	203.048
PE 13:0_13:1	C31 H60 N O8 P	605.405	11.428	606.413
6??-Hydroxytestosterone	C19 H28 O3	304.2	1.41	305.207
PG 17:1_17:1	C40 H75 O10 P	763.537	11.81	764.544
Estradiol	C18 H24 O2	272.177	6.006	273.185
Glycerol 1-hexadecanoate	C19 H38 O4	330.276	9.102	313.273
Diphenylamine	C12 H11 N	169.089	1.516	170.096
2-hydroxy-6-[(8Z,11Z)-pentadeca-8,11,14-trien-1-yl]benzoic acid	C22 H30 O3	342.217	8.115	343.224
(2R,3S,4S,5R,6R)-2-(hydroxymethyl)-6-(propan-2-yloxy)oxane-3,4,5-triol	C9 H18 O6	444.22	1.523	223.117
N1-(2-amino-2-oxoethyl)pent-3-enamide	C7 H12 N2 O2	156.091	5.202	330.217
N-Acetyl-D-tryptophan	C13 H14 N2 O3	246.101	5.297	247.108
2-Amino-1,3,4-octadecanetriol	C18 H39 N O3	317.293	6.582	318.3
N'2-(2-hydroxybenzylidene)-5-nitrofuran-2-carbohydrazide	C12 H9 N3 O5	297.038	5.722	298.045
2'-Deoxyadenosine	C10 H13 N5 O3	251.102	3.982	252.109
3-[4-methyl-1-(2-methylpropanoyl)-3-oxocyclohexyl]butanoic acid	C15 H24 O4	250.155	6.456	251.163
5-(acetylamino)-2-hydroxybenzoic acid	C9 H9 N O4	195.053	5.759	196.061
Dulcitol	C6 H14 O6	182.079	5.378	183.086
methadone-d9	C21 H18 [2]H9 N O	318.267	5.741	319.274
1-Methylguanosine	C11 H15 N5 O5	297.107	4.862	298.114
Calcium D-Panthotenate	C18 H32 Ca N2 O10	476.169	5.09	477.176
4-(allyloxy)-1,2-dihydroquinolin-2-one	C12 H11 N O2	201.079	5.393	202.086
Homovanillic acid	C9 H10 O4	182.058	5.211	183.065
5-(2,5-dihydroxyhexyl)oxolan-2-one	C10 H18 O4	224.105	3.624	225.112
Irganox 259	C40 H62 O6	678.453	7.882	661.45
3-[5-(benzylthio)-4-methyl-4H-1,2,4-triazol-3-yl]-5-oct-1-ynylpyridine	C23 H26 N4 S	390.193	5.52	391.201
N1-(1,3-thiazol-2-yl)-2-chlorobenzamide	C10 H7 Cl N2 O S	275.956	5.979	276.963
DG 16:0_16:1	C35 H66 O5	583.517	11.367	584.524
Capric acid	C10 H20 O2	172.146	2.238	173.153
5-amino-2-(dimethylamino)benzoic acid	C9 H12 N2 O2	180.09	5.612	181.097
5-Methylcytidine	C10 H15 N3 O5	257.101	4.308	258.109
Pyridoxine O-Glucoside	C14 H21 N O8	331.126	5.325	332.133
5-Methylcytosine	C5 H7 N3 O	125.059	3.793	126.066
Benzamidine	C7 H8 N2	120.068	5.682	121.076
Anandamide (AEA)	C22 H37 N O2	347.28	9.718	348.287
Ecgonine methyl ester	C10 H17 N O3	199.121	1.974	200.128
bicyclo[2.2.2]oct-2-en-1-yl 4-methylbenzene-1-sulfonate	C15 H18 O3 S	278.093	4.683	595.149
N-Acetylmethionine	C7 H13 N O3 S	191.062	5.304	192.069
3-Nitro-L-Tyrosine	C9 H10 N2 O5	226.059	4.997	209.056
Nonanoic acid	C9 H18 O2	158.131	7.465	339.25
N1-(2-cyanoethyl)-N1-cyclohexyl-4-bromobenzene-1-sulfonamide	C15 H19 Br N2 O2 S	370.033	5.509	371.04
KKK	C18 H38 N6 O4	384.282	9.645	385.289
tetranor-12(R)-HETE	C16 H26 O3	248.175	7.034	249.182
Nicotinamide	C6 H6 N2 O	122.048	2.319	123.055
SPB 18:1;2O	C18 H37 N O2	299.282	7.18	300.289
3-Methoxyflavone	C16 H12 O3	274.06	1.349	275.067
Trigonelline	C7 H7 N O2	137.048	4.865	138.055
6-cyclohex-3-enyl-5-nitropiperidin-2-one	C11 H16 N2 O3	224.116	5.558	225.123
LPE 16:0	C21 H44 N O7 P	453.285	11.039	454.292
PE 14:0_14:0	C33 H66 N O8 P	635.452	11.131	636.46
methyl 3,4,5-trihydroxycyclohex-1-ene-1-carboxylate	C8 H12 O5	170.055	0.973	171.063
D-(+)-Maltose	C12 H22 O11	364.098	1.394	365.105
2-Hydroxyphenylalanine	C9 H11 N O3	181.074	5.185	182.081
ELK	C17 H32 N4 O6	388.232	5.417	389.239
Androsterone	C19 H30 O2	285.266	9.14	308.256
Acetylcysteine	C5 H9 N O3 S	163.03	1.529	146.027
Prostaglandin K2	C20 H30 O5	332.196	6.954	333.203
5-hydroxy-6,7-dimethoxy-2-phenyl-4H-chromen-4-one	C17 H14 O5	280.073	4.533	281.08
Kinetin	C10 H9 N5 O	237.063	1.605	238.071
5'-Methylthioadenosine	C11 H15 N5 O3 S	297.091	5.918	298.098
MAG (18:3)	C21 H36 O4	352.26	1.283	353.267
2-(tert-butyl)-1,3-thiazolane-4-carboxylic acid	C8 H15 N O2 S	172.056	5.579	190.09
Palmitoylcarnitine	C23 H45 N O4	399.334	8.013	400.342
Cyclic ADP-ribose	C15 H21 N5 O13 P2	541.061	1.641	542.068
N-(cyclopropylmethyl)-N'-phenylurea	C11 H14 N2 O	212.095	1.129	213.102
2-phenyl-2,3-dihydro-4(1H)-quinazolinone	C14 H12 N2 O	224.095	6.073	225.102
2-(benzylamino)-1,3-thiazole-5-carboxylic acid	C11 H10 N2 O2 S	117.024	5.697	235.055
O-Phospho-L-Tyrosine	C9 H12 N O6 P	261.04	2.878	262.047
3-Chloro-L-tyrosine	C9 H10 Cl N O3	215.035	6.006	216.042
Hydrocortisone acetate	C23 H32 O6	404.219	5.533	405.227
PAF C-16	C26 H54 N O7 P	523.364	10.379	524.371
(6E)-7-(2H-1,3-benzodioxol-5-yl)-1-(piperidin-1-yl)hept-6-en-1-one	C19 H25 N O3	315.181	6.47	316.188
PG 15:0_15:0	C36 H71 O10 P	711.505	10.265	712.512
Epinephrine bitartrate	C13 H19 N O9	333.106	5.003	356.094
QKK	C17 H34 N6 O5	770.465	5.38	386.24
4-(cyanomethyl)phenyl nicotinate	C14 H10 N2 O2	238.075	5.811	239.082
Cytidine 5'-Monophosphate-N-Acetylneuraminic Acid	C20 H31 N4 O16 P	614.148	2.212	308.081
N-Acetylneuraminic acid	C11 H19 N O9	331.088	3.969	332.095
Dihomo-γ-linolenic acid methyl ester	C21 H36 O2	337.296	7.034	338.303
1,4-dihydroxyheptadec-16-en-2-yl acetate	C19 H36 O4	328.261	9.173	351.25
cAMP	C10 H12 N5 O6 P	329.052	3.557	330.06
Neodiosmin	C28 H32 O15	630.163	11.553	631.17
Nicotinamide adenine dinucleotide phosphate (NADP+)	C21 H28 N7 O17 P3	743.075	1.479	744.082
Diisobutylphthalate	C16 H22 O4	278.151	1.342	317.115
acetyl phospahte	C2 H5 O5 P	139.987	1.615	298.009
Adipamide	C6 H12 N2 O2	144.09	2.951	145.097
2-(tert-butyl)-6,7-dimethoxy-4H-3,1-benzoxazin-4-one	C14 H17 N O4	263.113	6.043	264.121
11-Oxoetiocholanolone	C19 H28 O3	286.189	5.341	287.196
3-Hydroxy-3-methylbutanoic acid	C5 H10 O3	118.061	2.319	119.068
4-Aminoindole	C8 H8 N2	132.068	4.853	265.144
S-(5-Adenosy)-L-Homocysteine	C14 H20 N6 O5 S	384.12	1.376	385.127
(-)-Epigallocatechin	C15 H14 O7	634.134	2.248	635.142
Acetophenone	C8 H8 O	120.055	1.549	121.062
[5-(2-thienyl)-3-isoxazolyl]methanol	C8 H7 N O2 S	181.02	6.191	182.027
N-[2-(1,5-dimethyl-4-nitro-1H-pyrazol-3-yl)vinyl]-N,N-dimethylamine	C9 H14 N4 O2	210.111	2.123	211.119
Pantothenic acid	C9 H17 N O5	219.11	5.078	220.118
Chenodeoxycholic acid-3-beta-D-glucuronide	C30 H48 O10	568.325	9.343	569.332
gamma-Glutamylleucine	C11 H20 N2 O5	260.137	5.384	261.144
(2,6-dimethylmorpholino)(1-methyl-5-nitro-1H-pyrazol-4-yl)methanone	C11 H16 N4 O4	612.152	9.504	307.083
Thymidine 3,5-cyclic monophosphate	C10 H13 N2 O7 P	304.047	4.039	305.054
D-Raffinose	C18 H32 O16	526.151	1.434	527.158
N-Tetradecanamide	C14 H29 N O	227.225	8.699	228.232
4-(4-methoxyphenyl)-2-(methylthio)pyrimidine	C12 H12 N2 O S	254.046	0.526	255.053
D-Glucuronic acid	C6 H10 O7	194.043	7.368	195.05
1,3-Dimethyluric Acid	C7 H8 N4 O3	196.06	8.252	431.085
N,N-dimethyl-5-nitro-6-[3-(trifluoromethyl)phenoxy]pyrimidin-4-amine	C13 H11 F3 N4 O3	328.077	5.629	329.084
Maltotetraose	C24 H42 O21	666.222	1.477	689.211
dUDP	C9 H14 N2 O11 P2	388.007	2.754	410.996
DL-Arginine	C6 H14 N4 O2	157.085	1.364	175.119
N-[4-chloro-2-(2-chlorobenzoyl)phenyl]-2-(4-methylpiperidino)acetamide	C21 H22 Cl2 N2 O2	183.075	5.603	405.113
N-{6-[(5-chloro-3-pyridyl)oxy]-3-pyridyl}-N'-methylurea	C12 H11 Cl N4 O2	261.031	4.833	279.065
4-(trifluoromethyl)nicotinic acid	C7 H4 F3 N O2	191.017	1.339	192.024
Betaine	C5 H11 N O2	117.079	1.387	118.086
PE 18:1_18:1	C41 H78 N O8 P	743.545	11.751	744.553
3-(3,4-dimethylphenyl)-3,4-dihydro-1,2,3-benzotriazin-4-one	C15 H13 N3 O	289.059	1.477	290.066
3-(2-thienylmethylidene)chroman-4-one	C14 H10 O2 S	242.04	1.543	243.047
Pleuromutilin	C22 H34 O5	416.194	8.534	417.201
PE 14:0_15:1	C34 H66 N O8 P	647.453	10.96	648.46
1,2-di(3,4-dimethoxyphenyl)diaz-1-ene	C16 H18 N2 O4	324.112	5.496	325.119
ethyl 2-amino-3-phenylpropanoate hydrochloride	C11 H15 N O2	193.11	5.633	194.118
S-Adenosyl-L-methionine	C15 H22 N6 O5 S	398.137	5.327	399.144
PG 16:0_17:1	C39 H75 O10 P	751.54	11.315	752.547
PE 15:0_15:1	C35 H68 N O8 P	661.468	11.395	662.475
Leu-Pro	C11 H20 N2 O3	228.147	5.558	229.155
cis-gondoic acid	C20 H38 O2	310.287	7.789	328.32
Syringic acid	C9 H10 O5	198.05	5.446	199.058
N-Acetyl-L-leucine	C8 H15 N O3	173.105	5.609	174.112
DGGA 16:1_16:1	C41 H72 O11	757.526	11.805	758.534
D-Alanyl-D-alanine	C6 H12 N2 O3	160.085	1.468	161.092
Erythromycin	C37 H67 N O13	733.463	11.029	734.47
PMeOH 16:0_16:1	C36 H69 O8 P	677.499	11.24	678.506
All trans-Retinal	C20 H28 O	284.214	8.128	285.221
5-Hydroxyindole-3-acetic acid	C10 H9 N O3	191.058	5.301	192.065
PE 17:0_17:0	C39 H78 N O8 P	719.544	11.668	720.551
2-Methoxyestradiol (2-MeOE2)	C19 H26 O3	302.187	6.31	303.195
5,8-dihydroxy-10-methyl-5,8,9,10-tetrahydro-2H-oxecin-2-one	C10 H14 O4	220.071	5.897	221.078
1-(6-methyl-3-pyridyl)ethan-1-one O1-ethyloxime hydrochloride	C10 H14 N2 O	178.111	5.442	179.118
APH	C14 H21 N5 O4	305.15	1.933	306.158
Glycyl-L-leucine	C8 H16 N2 O3	188.116	5.032	189.123
Tetranor-12(S)-HETE	C16 H26 O3	288.167	8.257	289.175
MNH	C15 H24 N6 O5 S	200.079	5.296	201.087
N,N-Diethylethanolamine	C6 H15 N O	117.115	2.581	118.123
Tetrahydrocortisone	C21 H32 O5	750.442	10.896	751.449
2-phenylthiomorpholin-3-one	C10 H11 N O S	193.056	6.004	194.063
2'-O-Methyl-5-methylcytidine	C11 H17 N3 O5	271.117	3.791	272.124
DKK	C16 H31 N5 O6	371.217	1.632	372.224
L-Norleucine	C6 H13 N O2	131.095	3.164	132.102
NAD+	C21 H27 N7 O14 P2	663.108	1.881	332.561
Vitamin U	C6 H14 Cl N O2 S	199.044	5.344	200.051
β-Cortolone	C21 H34 O5	732.493	8.43	733.5
PE 16:1_16:1	C37 H70 N O8 P	687.483	11.736	688.49
1,4-dihydroxy-1,4-dimethyl-7-(propan-2-ylidene)-decahydroazulen-6-one	C15 H24 O3	274.154	6.738	275.161
Oleamide	C18 H35 N O	281.271	9.825	282.279
2-(methylthio)nicotinamide	C7 H8 N2 O S	190.013	6.633	191.02
TG 15:1_18:3_18:3	C54 H90 O6	856.65	10.35	857.657
cGMP	C10 H12 N5 O7 P	345.048	4.139	346.055
UDP-galactose	C15 H24 N2 O17 P2	566.055	0.536	567.063
DL-Citrulline	C6 H13 N3 O3	175.096	1.514	176.103
Octhilinone	C11 H19 N O S	213.119	4.226	214.126
1-(3-ethyl-2,4-dihydroxy-6-methoxyphenyl)butan-1-one	C13 H18 O4	220.11	8.316	221.117
L-Methionine Methyl Ester	C6 H13 N O2 S	163.067	3.343	164.074
5-Hydroxytryptophol	C10 H11 N O2	177.079	5.22	178.086
Fenbendazole sulfone	C15 H13 N3 O4 S	331.068	1.969	332.075
α-Ergocryptine	C32 H41 N5 O5	557.309	9.06	558.317
L-Glutathione (reduced)	C10 H17 N3 O6 S	307.083	1.844	308.09
6-phospho-D-glucono-1,5-lactone	C6 H11 O9 P	258.014	1.546	259.021
2-[(butylamino)(imino)methyl]-1-oxohydrazinium-1-olate	C5 H12 N4 O2	182.078	4.585	183.085
2-Phenylacetamide	C8 H9 N O	135.066	0.995	136.073
Bitertanol	C20 H23 N3 O2	337.178	10.546	338.185
N1-(3,5-dichlorophenyl)-3-amino-3-hydroxyiminopropanamide	C9 H9 Cl2 N3 O2	282.986	11.105	283.993
DL-Panthenol	C9 H19 N O4	205.131	5.096	206.139
Monoolein	C21 H40 O4	356.292	10.01	357.299
Dl-3,4-Dihydroxymandelic Acid	C8 H8 O5	184.037	5.044	185.045
2,3-Dinor-TXB2	C18 H30 O6	342.203	6.324	343.21
Cnidioside A	C17 H20 O9	390.101	8.105	391.107
D-Gluconic acid	C6 H12 O7	196.058	8.271	197.066
2-Methylbutyl beta-D-glucopyranoside	C11 H22 O6	250.142	7.369	273.131
N1-(1H-1,2,4-triazol-3-yl)-2-hydroxybenzamide	C9 H8 N4 O2	204.061	6.036	205.069
Pyridoxamine	C8 H12 N2 O2	168.09	4.824	169.097
octadec-9-ynoic acid	C18 H32 O2	262.229	9.255	280.263
Prolylleucine	C11 H20 N2 O3	228.147	4.976	229.155
Albendazole sulfone	C12 H15 N3 O4 S	297.082	5.072	298.09
Tetramethylpyrazine	C8 H12 N2	136.1	6.294	137.107
Cysteinylglycine	C5 H10 N2 O3 S	178.041	1.826	179.048
LNH	C16 H26 N6 O5	382.196	7.581	383.204
DL-2-(acetylamino)-3-phenylpropanoic acid	C11 H13 N O3	207.09	5.526	208.097
D-Pantethine	C22 H42 N4 O8 S2	554.245	5.503	577.234
Vitexin	C21 H20 O10	454.089	5.26	455.096
4-methoxy-6-[2-(4-methoxyphenyl)ethyl]-2H-pyran-2-one	C15 H16 O4	596.128	2.188	299.071
L-Glutamic acid	C5 H9 N O4	147.053	1.391	148.06
PE 16:0_17:1	C38 H74 N O8 P	703.515	10.328	704.522
Glu-Val-Phe	C19 H27 N3 O6	393.19	5.446	394.197
Eicosapentaenoic acid	C20 H30 O2	302.224	8.126	303.232
DLK	C16 H30 N4 O6	374.217	4.913	375.224
O-Succinyl-L-homoserine	C8 H13 N O6	219.074	2.668	220.081
Spinosyn A	C41 H65 N O10	731.447	11.725	732.455
N-cyclooctylurea	C9 H18 N2 O	170.142	1.382	171.149
D-Ala-D-Ala	C6 H12 N2 O3	160.085	2.133	161.092
Nitrosonornicotine	C9 H11 N3 O	177.092	6.106	178.099
2-Methoxyresorcinol	C7 H8 O3	140.047	5.51	141.055
2-morpholino-1-phenyl-1-ethanol	C12 H17 N O2	189.115	5.283	190.123
2-Hydroxycinnamic acid	C9 H8 O3	164.047	2.311	165.054
Imidazolelactic acid	C6 H8 N2 O3	156.053	1.456	157.061
4-morpholinobenzoic acid	C11 H13 N O3	229.071	5.657	230.079
1-(3,4-dimethylphenyl)-3-piperidinopyrrolidine-2,5-dione	C17 H22 N2 O2	286.168	5.481	287.175
5-Hydroxydiclofenac	C14 H11 Cl2 N O3	311.013	2.281	312.02
S-Adenosylmethionine	C15 H22 N6 O5 S	398.137	1.395	200.076
MMK	C16 H32 N4 O4 S2	390.175	1.858	391.182
D-Fructose 1,6-bisphosphate	C6 H14 O12 P2	339.996	1.187	362.985
L-Tyrosine	C9 H11 N O3	181.074	2.298	182.081
Alloxan	C4 H4 N2 O5	160.011	3.943	161.019
(1R,2R)-trans-N-Boc-1,2-cyclohexanediamine	C11 H22 N2 O2	214.168	5.928	215.175
L-Alanyl-L-proline	C8 H14 N2 O3	186.1	2.016	169.097
D-Homocysteine	C4 H9 N O2 S	135.035	1.525	136.043
5-(6-hydroxy-6-methyloctyl)-2,5-dihydrofuran-2-one	C13 H22 O3	248.139	6.538	249.146
Oleoyl ethanolamide	C20 H39 N O2	307.287	9.299	308.294
PE 32:1	C37 H72 N O8 P	711.48	10.986	712.488
3-amino-2-phenyl-2H-pyrazolo[4,3-c]pyridine-4,6-diol	C12 H10 N4 O2	242.08	5.826	243.087
1,3-Dimethyluracil	C6 H8 N2 O2	140.059	1.515	124.039
MGMG (18:2)	C27 H48 O9	516.328	5.022	259.171
3-(dimethylamino)-1-[4-(phenylsulfonyl)phenyl]prop-2-en-1-one	C17 H17 N O3 S	315.093	3.211	316.1
Vindoline	C25 H32 N2 O6	912.467	4.83	457.241
Hexadecanamide	C16 H33 N O	255.256	9.606	256.263
Corey Lactone Diol	C8 H12 O4	172.073	1.512	190.107
Caprolactam	C6 H11 N O	113.084	1.545	114.091
Catechin	C15 H14 O6	312.063	6.066	313.07
Deoxyguanosine	C10 H13 N5 O4	267.097	1.395	250.093
Porphobilinogen	C10 H14 N2 O4	226.095	1.556	227.102
2-(3,4-dimethoxyphenyl)ethanamine	C10 H15 N O2	181.11	5.881	182.117
7-Methylguanine	C6 H7 N5 O	165.065	2.155	166.072
PE 15:1_15:1	C35 H66 N O8 P	659.452	10.318	660.46
(5-L-Glutamyl)-L-Amino Acid	C8 H14 N2 O5	218.09	1.647	219.097
Diethyl phosphate	C4 H11 O4 P	154.039	5.867	155.047
N(6)-OH-Me-Adenosine	C11 H15 N5 O5	594.207	5.35	298.111
3-Hydroxyphenylacetic acid	C8 H8 O3	152.046	1.744	153.054
3-(dimethylamino)-1-(5-methyl-3-phenyl-4-isoxazolyl)-2-propen-1-one	C15 H16 N2 O2	278.103	2.507	279.11
(2E)-1-(2-hydroxy-3,4,5,6-tetramethoxyphenyl)-3-phenylprop-2-en-1-one	C19 H20 O6	326.113	5.031	327.12
Υ-Glutamylcysteine	C8 H14 N2 O5 S	250.062	4.558	233.059
Estrone	C18 H22 O2	287.184	2.912	288.192
Nicotinamide adenine dinucleotide (NAD+)	C21 H27 N7 O14 P2	663.109	1.662	664.116
2-[3-(4-pyridyl)-1H-1,2,4-triazol-5-yl]pyridine	C12 H9 N5	223.084	5.599	224.092
2-Benzyl-5-[(3S)-1-isopropyl-3-pyrrolidinyl]-1,3,4-oxadiazole	C16 H21 N3 O	271.171	5.166	272.178
Eucalyptol	C10 H18 O	154.136	1.574	155.143
Coniferin	C16 H22 O8	364.113	5.609	365.12
Aflatoxin M1	C17 H12 O7	350.034	4.012	351.041
N-{4-[(3,5-dichloroanilino)sulfonyl]phenyl}-3-morpholinopropanamide	C19 H21 Cl2 N3 O4 S	457.065	5.013	458.072
2-methyl-1H-benzimidazole-5-carboxylic acid	C9 H8 N2 O2	176.058	2.459	177.066
WLH	C23 H30 N6 O4	436.229	5.406	437.236
1-Palmitoylglycerol	C19 H38 O4	330.277	9.815	353.266
Maltopentaose	C30 H52 O26	850.257	1.664	851.264
Methionine sulfoxide	C5 H11 N O3 S	165.046	1.951	166.053
Cytidine 5'-monophosphate (hydrate)	C9 H14 N3 O8 P	345.033	1.463	346.041
(5S)-5-hydroxy-1,7-diphenylheptan-3-one	C19 H22 O2	304.142	5.031	305.149
Uracil	C4 H4 N2 O2	112.027	1.797	113.034
L-Cystine	C6 H12 N2 O4 S2	240.024	1.439	241.031
2-acetamido-3-(4-methoxyphenyl)propanoic acid	C12 H15 N O4	237.1	5.148	238.107
o-Cresol	C7 H8 O	108.058	6.124	109.065
1-(3,4-dihydroxyphenyl)-7-(4-hydroxyphenyl)heptan-3-one	C19 H22 O4	336.132	5.209	337.139
L-Alanyl-L-Lysine	C9 H19 N3 O3	217.143	1.385	218.15
N-(5-acetamidopentyl)acetamide	C9 H18 N2 O2	416.242	3.986	209.128
QNK	C15 H28 N6 O6	388.207	1.475	195.111
RKK	C18 H38 N8 O4	215.152	5.112	198.149
Gamma-Glu-Leu	C11 H20 N2 O5	260.137	5.093	261.145
Spermidine	C7 H19 N3	145.158	1.598	146.165
PE 17:0_17:1	C39 H76 N O8 P	717.53	11.253	718.538
2-Phenylpropionic acid	C9 H10 O2	150.068	1.893	168.102
Levodopa	C9 H11 N O4	197.069	5.158	198.076
ADBICA N-pentanoic acid metabolite	C20 H27 N3 O4	395.181	2.257	396.188
XLR11 N-(4-pentenyl) analog	C21 H27 N O	309.205	4.66	310.212
YLK	C21 H34 N4 O5	464.264	5.289	465.271
1-(3,4-dimethoxyphenyl)ethan-1-one oxime	C10 H13 N O3	195.09	5.429	196.097
Thiazolidine-4-carboxylic acid	C4 H7 N O2 S	133.02	1.494	134.027
LPE 16:2	C21 H40 N O7 P	449.254	6.893	450.261
6β-Naltrexol	C20 H25 N O4	343.174	5.308	344.182
Tetracycline	C22 H24 N2 O8	444.154	5.439	445.161
DL-Lysine	C6 H14 N2 O2	146.105	1.189	147.113
lipoamide	C8 H15 N O S2	205.06	5.047	206.067
L-Carnitine	C7 H15 N O3	161.105	1.618	162.112
S-Lactoyglutathione	C13 H21 N3 O8 S	379.105	2.044	380.112
7-hydroxy-6-nitro-2,3-dihydro-1H,5H-pyrido[3,2,1-ij]quinolin-5-one	C12 H10 N2 O4	246.067	5.356	247.075
Guanine	C5 H5 N5 O	151.049	1.746	152.057
N-Methyldioctylamine	C17 H37 N	255.292	7.472	256.3
N'2-cinnamoyl-3-(1H-pyrrol-1-yl)thiophene-2-carbohydrazide	C18 H15 N3 O2 S	319.075	1.536	320.083
Debromohymenialdisine	C11 H11 N5 O2	267.071	5.01	268.078
Kanosamine	C6 H13 N O5	161.069	1.693	162.076
4-(5H-thieno[3',2':5,6]thiino[4,3-d]pyrimidin-2-yl)benzamide	C16 H11 N3 O S2	325.03	5.176	326.037
Oleoyl-L-alpha-lysophosphatidic acid	C21 H40 Na O7 P	458.239	5.289	459.246
HQH	C17 H24 N8 O5	458.147	4.844	459.154
dAMP	C10 H14 N5 O6 P	331.069	5.368	680.17
Homogentisic Acid	C8 H8 O4	168.042	5.144	169.049
ethyl 4-amino-2-[(3-nitro-2-pyridyl)thio]pyrimidine-5-carboxylate	C12 H11 N5 O4 S	321.047	3.497	322.055
Prostaglandin E2-1-glyceryl ester	C23 H38 O7	816.518	7.652	409.266
Alanyltyrosine	C12 H16 N2 O4	252.111	5.664	253.118
Dopamine	C8 H11 N O2	153.079	3.133	154.086
Psilocybin	C12 H17 N2 O4 P	284.091	5.57	285.098
alpha-Ketoglutaric acid	C5 H6 O5	146.022	1.969	310.077
4-acetyl-4-(ethoxycarbonyl)heptanedioic acid	C12 H18 O7	256.092	6.922	257.1
Benzamide	C7 H7 N O	139.063	5.465	140.071
Maltotriose	C18 H32 O16	504.171	3.983	253.093
Triacanthine	C10 H13 N5	203.117	5.786	204.124
SPB 17:1;2O	C17 H35 N O2	285.266	6.896	286.274
P-Aminohippuric Acid	C9 H10 N2 O3	194.069	2.464	195.076
2-Isobutyl-3-methoxypyrazine	C9 H14 N2 O	166.111	4.808	167.118
5α-Dihydrotestosterone glucuronide	C25 H38 O8	932.51	5.457	467.262
Metanephrine	C10 H15 N O3	197.105	5.496	198.112
L-(-)-Methionine	C5 H11 N O2 S	149.051	1.952	150.058
1-(2-furyl)pentane-1,4-dione	C9 H10 O3	188.045	5.684	189.052
(1E,4E)-1,5-bis(4-methoxyphenyl)penta-1,4-dien-3-one	C19 H18 O3	316.106	4.901	317.113
N,N-Dimethyldecylamine N-oxide	C12 H27 N O	201.209	6.187	202.216
(3-Methoxy-4-hydroxyphenyl)ethylene glycol sulfate	C9 H12 O7 S	264.03	5.677	265.037
3-(tert-butyl)-1-methyl-4,5-dihydro-1H-pyrazol-5-one	C8 H14 N2 O	154.111	5.426	155.118
N2-Acetyl-L-ornithine	C7 H14 N2 O3	174.1	1.501	175.108
3-(methylsulfonyl)-2H-chromen-2-one	C10 H8 O4 S	241.038	5.567	242.045
2-{2-[(1-methyl-1H-pyrazol-5-yl)amino]-2-oxoethoxy}acetic acid	C8 H11 N3 O4	213.076	5.758	214.084
2,6-Dihydroxypurine	C5 H4 N4 O2	152.033	1.748	153.041
N8-Acetylspermidine	C9 H21 N3 O	187.168	1.364	188.176
5-acetyl-2,6-dimethyl-1,2,3,4-tetrahydropyridin-4-one	C9 H13 N O2	167.095	4.873	168.102
4-(2,3-dihydro-1,4-benzodioxin-6-yl)butanoic acid	C12 H14 O4	222.087	5.896	223.094
7-methylpyrimido[4,5-d]pyrimidin-4-amine	C7 H7 N5	183.053	5.051	184.06
LPC 16:0-SN1	C24 H50 N O7 P	495.332	9.323	496.339
PE 15:0_15:0	C35 H70 N O8 P	663.484	10.56	664.491
3,5-di(prop-2-ynylthio)isothiazole-4-carbonitrile	C10 H6 N2 S3	249.964	1.407	250.972
morphine-d3	C17 H16 [2]H3 N O3	288.155	5.472	289.162
6,6-dimethyl-4-piperidino-5,6-dihydro-2H-thiine-2-thione	C12 H19 N S2	241.092	5.424	242.1
T-2 Triol	C20 H30 O7	399.223	1.895	400.23
Uridine 5'-monophosphate	C9 H13 N2 O9 P	324.035	1.507	362.999
PE 35:2	C40 H76 N O8 P	751.512	10.936	752.519
L-Glutathione oxidized	C20 H32 N6 O12 S2	612.151	2.113	307.083
Inosine 5'-Monophosphate	C10 H13 N4 O8 P	348.047	1.531	349.054
3-methyl-5-oxo-5-(4-toluidino)pentanoic acid	C13 H17 N O3	514.205	5.254	258.11
Lysine Butyrate	C10 H22 N2 O4	234.158	1.385	235.165
3-isopropoxy-4-morpholinocyclobut-3-ene-1,2-dione	C11 H15 N O4	242.127	5.036	243.134
Bisphenol G	C21 H28 O2	329.231	5.103	330.239
2,8-Quinolinediol	C9 H7 N O2	161.051	2.278	162.058
Tramadol N-Oxide	C16 H25 N O3	279.181	6.538	280.188
O-Phospho-L-serine	C3 H8 N O6 P	185.009	1.374	186.016
Serotonin	C10 H12 N2 O	176.095	5.392	160.076
3-Methyl-2-oxobutanoic acid	C5 H8 O3	116.047	1.615	117.055
D-(+)-Proline	C5 H9 N O2	115.063	1.453	116.071
Xanthurenic acid	C10 H7 N O4	205.041	1.507	206.048
PE 34:1	C39 H76 N O8 P	739.508	11.35	740.515
N-Acetyl-L-tyrosine	C11 H13 N O4	223.084	5.206	224.092
o-Veratraldehyde	C9 H10 O3	166.063	5.683	167.07
Ne-(1-Carboxymethyl)-L-lysine	C8 H16 N2 O4	204.111	3.979	205.118
1-(1-adamantyl)-2-[(2-chloro-4-fluorophenyl)thio]ethan-1-one	C18 H20 Cl F O S	338.089	6.255	339.097
DL-Tryptophan	C11 H12 N2 O2	204.09	5.208	205.097
Kynurenic acid	C10 H7 N O3	189.046	5.12	190.053
Pantetheine	C11 H22 N2 O4 S	278.13	5.349	279.137
β-Estradiol	C18 H24 O2	272.174	4.003	273.181
N1-[2-(4-chlorophenyl)-2-oxoethyl]-4-chlorobenzamide	C15 H11 Cl2 N O2	258.14	5.447	259.148
Lenalidomide	C13 H13 N3 O3	276.115	1.63	277.122
ERH	C17 H28 N8 O6	440.217	7.529	441.225
PC O-16:0	C24 H50 N O7 P	495.332	9.107	496.339
6-Phosphogluconic acid	C6 H13 O10 P	276.025	1.419	277.032
2-(2-hydroxy-3-methylbutanamido)-4-methylpentanoic acid	C11 H21 N O4	231.147	5.163	232.154
4-oxo-5-phenylpentanoic acid	C11 H12 O3	209.103	2.582	210.11
TLK	C16 H32 N4 O5	360.239	6.168	361.246
4-Ethoxybenzaldehyde	C9 H10 O2	150.067	6.252	339.097
N-Acetylputrescine	C6 H14 N2 O	130.111	1.539	131.118
methyl 3-(6-methylpyridin-2-yl)-2,2-diphenylpropanoate	C22 H21 N O2	331.156	5.486	332.163
Gatifloxacin	C19 H22 F N3 O4	357.154	5.698	358.162
Indole-3-acrylic acid	C11 H9 N O2	187.063	5.208	188.071
Nicotinic acid	C6 H5 N O2	123.032	1.964	124.039
Epinephrine	C9 H13 N O3	183.09	5.078	184.097
1-(4-chlorophenyl)-4-hydroxy-6-isopropyl-3-phenylpyridin-2(1H)-one	C20 H18 Cl N O2	339.104	2.75	340.111
2,6-Di-tert-butyl-1,4-benzoquinone	C14 H20 O2	220.144	6.534	221.151
Methyl palmitate	C17 H34 O2	287.282	6.579	288.289
PE 34:2	C39 H74 N O8 P	737.496	11.357	738.503
diethyl 2-[(4-benzhydrylpiperidino)methylidene]malonate	C26 H31 N O4	459.179	2.833	230.597
2-(benzylthio)-4-[2-(3-methylbenzo[b]thiophen-2-yl)vinyl]pyrimidine	C22 H18 N2 S2	748.19	5.607	375.102
Sildenafil-d3	C22 H27 [2]H3 N6 O4 S	954.445	5.458	478.23
Lysopg 18:1	C24 H47 O9 P	510.296	10.959	511.303
Gly-Tyr-Ala	C14 H19 N3 O5	309.132	5.272	310.14
Indole	C8 H7 N	117.058	5.208	118.065
L-Leucyl-L-Alanine	C9 H18 N2 O3	202.132	2.197	203.139
ATP	C10 H16 N5 O13 P3	506.994	5.683	508.001
1-adamantyl(piperidino)methanone	C16 H25 N O	269.173	1.914	270.181
Pilocarpine	C11 H16 N2 O2	208.121	4.894	209.128
Sphingosine (d18:1)	C18 H37 N O2	168.618	4.937	338.243
1-Methylguanine	C6 H7 N5 O	165.065	2.735	166.072
N,N'-di[4-(2,6-dimethylmorpholino)phenyl]thiourea	C25 H34 N4 O2 S	227.116	8.166	477.222
4-[(4-chlorophenyl)thio]-5-methylthieno[2,3-d]pyrimidine	C13 H9 Cl N2 S2	270.005	5.866	292.994
VLK	C17 H34 N4 O4	358.258	5.228	180.136
Octadecanamine	C18 H39 N	269.308	8.484	270.315
Pipecolic acid	C6 H11 N O2	129.079	1.261	147.113
L-Argininosuccinate	C10 H18 N4 O6	290.122	5.322	291.129
8-(1,2-dihydroxy-3-methylbut-3-en-1-yl)-7-methoxy-2H-chromen-2-one	C15 H16 O5	314.055	5.814	315.062
Cys-Gly	C5 H10 N2 O3 S	178.041	4.01	179.049
Coumarin	C9 H6 O2	108.081	2.311	147.044
5-Methyl-dl-tryptophan	C12 H14 N2 O2	218.105	5.308	475.172
3-hydroxy-4-methoxy-[2,2'-bipyridine]-6-carboxamide	C12 H11 N3 O3	267.06	5.691	268.067
L-Histidine	C6 H9 N3 O2	155.069	1.375	156.077
LPC 16:0	C24 H50 N O7 P	517.314	9.321	518.322
Nicotinate ribonucleoside	C11 H13 N O6	255.074	1.516	256.081
2,3,5,6-Tetramethylpyrazine	C8 H12 N2	136.1	5.735	137.107
4-(pentyloxy)benzene-1-carbohydrazide	C12 H18 N2 O2	222.134	5.44	223.142
2,3-dihydroxypropyl 12-methyltridecanoate	C17 H34 O4	284.235	8.232	285.242
Gly-Tyr	C11 H14 N2 O4	238.095	2.945	239.102
3-(3-Methoxyphenyl)propionic acid	C10 H12 O3	180.079	5.492	198.112
2-(1H-benzimidazol-2-yl)-N-[4-(benzyloxy)phenyl]benzamide	C27 H22 N4 O2	450.15	5.688	473.139
Cytosine	C4 H5 N3 O	111.043	1.639	112.05
α-Lapachone	C15 H14 O3	264.078	2.974	265.085
4-methyl-6-[(4-methylphenyl)thio]-2-(2-pyridyl)pyrimidine	C17 H15 N3 S	293.098	3.814	294.106
Enrofloxacin	C19 H22 F N3 O3	381.147	6.37	382.154
Gly-Phe	C11 H14 N2 O3	222.1	5.232	223.108
Prostaglandin A3	C20 H28 O4	314.183	8.518	315.19
dCMP	C9 H14 N3 O7 P	307.057	1.52	308.064
8-Hydroxyguanosine	C10 H13 N5 O6	299.088	2.557	300.095
Biotin	C10 H16 N2 O3 S	466.198	5.592	489.187
4-Hydroxybenzaldehyde	C7 H6 O2	122.035	1.247	123.042
Octanedioic acid	C8 H14 O4	174.089	1.617	175.097
α-Hydroxyhippuric acid	C9 H9 N O4	195.05	2.698	196.058
3'-Dephospho-CoA	C21 H35 N7 O13 P2 S	687.149	4.938	688.156
5-Aminosalicylic Acid	C7 H7 N O3	153.043	1.984	154.05
RQH	C17 H29 N9 O5	461.212	1.74	462.219
PE 31:1	C36 H70 N O8 P	697.466	10.195	698.473
dUMP	C9 H13 N2 O8 P	308.042	3.238	291.039
methyl 2,5-dimethyl-1H-pyrrole-3-carboxylate	C8 H11 N O2	153.079	1.547	154.086
FPH	C20 H25 N5 O4	381.185	5.665	382.192
L-Homocitrulline	C7 H15 N3 O3	189.111	1.49	190.118
Glutaric acid	C5 H8 O4	132.042	2.602	115.039
L-cysteine	C3 H7 N O2 S	121.02	1.399	122.027
Pyrogallol	C6 H6 O3	104.047	2.369	127.036
3-hydroxy-3-methylpentanedioic acid	C6 H10 O5	184.037	4.425	185.045
3'-Adenosine monophosphate (3'-AMP)	C10 H14 N5 O7 P	347.063	2.067	348.07
5α-Tetrahydrocortisol	C21 H34 O5	754.476	11.785	755.483
pentane-1,2,3,4,5-pentol	C5 H12 O5	174.053	3.679	175.06
L-Threonine	C4 H9 N O3	119.058	1.392	120.066
Diethyl maleate	C8 H12 O4	172.071	3.849	173.078
N-lactoyl-phenylalanine	C12 H15 N O4	237.1	4.854	255.134
Agmatine	C5 H14 N4	130.122	1.321	131.129
3-(5-phenyl-1,3-oxazol-2-yl)-4-(trifluoromethyl)pyridine	C15 H9 F3 N2 O	290.063	4.143	291.07
5,7-dihydroxy-2-phenyl-4H-chromen-4-one	C15 H10 O4	254.058	6.615	255.065
Tropine	C8 H15 N O	141.115	1.418	142.123
PE 33:1	C38 H74 N O8 P	725.497	10.331	726.504
2-hydroxy-3,6-diphenylcyclohexyl acetate	C20 H22 O3	332.14	5.762	333.147
6-(3-hydroxybutan-2-yl)-5-(hydroxymethyl)-4-methoxy-2H-pyran-2-one	C11 H16 O5	210.087	5.829	211.094
Citrinin	C13 H14 O5	114.05	5.592	251.088
D-Sphingosine	C18 H37 N O2	281.272	9.261	282.279
3-hydroxy-4-methoxy-9H-xanthen-9-one	C14 H10 O4	264.034	1.783	265.042
Thymine	C5 H6 N2 O2	126.043	3.206	127.05
Normorphine	C16 H17 N O3	271.124	5.682	272.132
Isoquinoline	C9 H7 N	147.068	5.989	130.065
2-phenyl-2,4,6,7-tetrahydrothiino[4,3-c]pyrazol-3-ol	C12 H12 N2 O S	232.069	5.836	233.076
YKK	C21 H35 N5 O5	874.524	7.612	438.269
Proline-hydroxyproline	C10 H16 N2 O4	211.084	5.325	229.118
L-Tyrosine methyl ester	C10 H13 N O3	195.089	5.01	196.097
(2E)-N-(4-acetamidobutyl)-3-(4-hydroxy-3-methoxyphenyl)prop-2-enamide	C16 H22 N2 O4	328.138	3.65	329.145
Epigallocatechin	C15 H14 O7	612.152	5.807	307.083
Shikonin	C16 H16 O5	310.084	1.587	311.091
2,4-dihydroxyheptadec-16-en-1-yl acetate	C19 H36 O4	310.25	8.463	311.258
ethyl 2-cyano-3-(3-thienyl)acrylate	C10 H9 N O2 S	224.066	5.811	225.073
gamma-Glutamyltyrosine	C14 H18 N2 O6	310.116	4.961	311.124
(2-butyl-1H-imidazol-4-yl)methanol	C8 H14 N2 O	154.111	3.398	155.118
N-Methylhydantoin	C4 H6 N2 O2	114.043	1.786	115.05
PE 30:1	C35 H68 N O8 P	683.456	11.734	684.463
2-[(3S)-1-(2-Chlorobenzyl)-3-pyrrolidinyl]-5-methyl-1,3,4-oxadiazole	C14 H16 Cl N3 O	277.095	5.674	278.102
Name	Formula	Molecular Weight	RT [min]	m/z
PE-Cer 24:3;2O/26:1	C52 H99 N2 O6 P	878.735	1.992	877.727
L-aspartic Acid	C4 H7 N O4	133.038	1.393	132.031
Methyl EudesMate	C11 H14 O5	226.084	5.32	225.077
Ascorbic acid	C6 H8 O6	176.032	1.584	175.025
LNAPE 16:1/N-26:5	C47 H82 N O8 P	819.563	10.853	818.555
IDP	C10 H14 N4 O11 P2	428.014	3.484	427.006
XMP	C10 H13 N4 O9 P	364.043	1.589	363.035
3,5-dimethyl-N'-[4-(trifluoromethyl)benzoyl]isoxazole-4-carbohydrazide	C14 H12 F3 N3 O3	327.083	2.213	326.075
Neohesperidin	C28 H34 O15	610.194	5.45	609.187
LPE 8:0	C13 H28 N O7 P	341.161	6.229	340.154
LPA 14:0	C17 H35 O7 P	382.212	8.988	381.205
DL-4-Hydroxyphenyllactic acid	C9 H10 O4	182.058	5.218	181.051
4-Nitrophenol	C6 H5 N O3	139.027	5.821	138.02
PMeOH 14:0_16:0	C34 H67 O8 P	634.457	8.255	633.449
N-Acetyl-1-aspartylglutamic acid	C11 H16 N2 O8	304.091	2.322	303.083
1,3,7-Trimethyluric acid	C8 H10 N4 O3	210.074	1.383	209.067
Propylparaben	C10 H12 O3	180.079	6.276	179.072
Deoxycholic acid	C24 H40 O4	392.293	7.928	391.286
Cholic acid	C24 H40 O5	408.288	7.004	407.281
Vanillin	C8 H8 O3	152.046	2.328	151.039
(±)9-HpODE	C18 H32 O4	312.23	7.788	293.212
Gluconic acid	C6 H12 O7	196.059	1.389	195.051
D-Sedoheptulose 7-phosphate	C7 H15 O10 P	290.041	1.234	289.033
N-Acetyl-L-phenylalanine	C11 H13 N O3	207.09	5.662	206.083
Salvinorin B	C21 H26 O7	390.175	3.982	389.168
4-Oxoproline	C5 H7 N O3	129.043	4.595	257.078
trans-10-Heptadecenoic Acid	C17 H32 O2	268.24	9.181	267.233
Tetradecanedioic acid	C14 H26 O4	258.184	7.009	257.176
FAHFA 18:1/20:3	C38 H66 O4	586.493	10.52	585.486
8(S),15(S)-DiHETE	C20 H32 O4	336.231	7.579	335.223
Gluconolactone	C6 H10 O6	178.048	1.403	177.041
Cannabichromevarin	C19 H26 O2	286.197	9.214	285.189
Taurochenodeoxycholic acid	C26 H45 N O6 S	499.301	5.507	498.294
PE 12:0_14:0	C31 H62 N O8 P	607.421	9.114	606.414
Lysopc 16:1	C24 H48 N O7 P	493.315	6.385	492.308
Phe-Pro	C14 H18 N2 O3	262.132	5.467	261.125
N-Acetylvaline	C7 H13 N O3	159.09	5.594	158.083
2-Hydroxy-4-methylthiobutanoic acid	C5 H10 O3 S	150.035	5.263	149.028
Testosterone sulfate	C19 H28 O5 S	368.165	10.238	367.158
GW501516	C21 H18 F3 N O3 S2	453.069	5.222	452.062
L-(-)-alpha-Amino-epsilon-Caprolactam	C6 H12 N2 O	128.095	3.988	173.093
Salicylic acid	C7 H6 O3	138.032	6.063	137.025
Acetyl-N-formyl-5-methoxykynurenamine	C13 H16 N2 O4	264.111	5.535	263.104
Folic acid	C19 H19 N7 O6	441.141	5.345	440.134
Capryloylglycine	C10 H19 N O3	201.137	5.728	200.13
4-Hydroxy-L-Glutamic Acid	C5 H9 N O5	163.049	4.894	325.09
13(S)-HOTrE	C18 H30 O3	294.22	7.873	293.213
2-Aminoadipic acid	C6 H11 N O4	161.069	2.191	160.062
MGDG O-28:6_18:1	C55 H94 O9	958.72	10.521	957.712
LNAPE 19:1/N-4:0	C28 H54 N O8 P	563.359	9.874	562.351
Lysopc 17:0	C25 H52 N O7 P	509.348	10.148	508.341
D-Ribulose 1,5-bisphosphate	C5 H12 O11 P2	309.986	1.191	308.978
5-Methoxyindole-3-Carbaldehyde	C10 H9 N O2	175.063	5.681	174.056
Hydroquinone	C6 H6 O2	110.037	4.834	155.035
D-Erythrose 4-phosphate	C4 H9 O7 P	200.009	1.503	199.002
Uric Acid	C5 H4 N4 O3	168.029	1.787	167.021
N6-Methyladenosine	C11 H15 N5 O4	281.112	2.262	280.105
Imidazoleacetic acid	C5 H6 N2 O2	126.043	3.501	125.036
Adenosine diphosphate (ADP)	C10 H15 N5 O10 P2	427.03	1.457	426.022
JWH 018 N-pentanoic acid metabolite	C24 H21 N O3	407.132	5.527	406.125
3,8,9-trihydroxy-10-propyl-3,4,5,8,9,10-hexahydro-2H-oxecin-2-one	C12 H20 O5	245.138	2.815	244.13
Coenzyme A	C21 H36 N7 O16 P3 S	767.115	5.09	382.55
Naringenin	C15 H12 O5	272.069	5.987	271.062
ethyl 3-[(1-benzyl-4-piperidyl)amino]-2-cyanoacrylate	C18 H23 N3 O2	313.179	8.915	312.172
PG 16:0_18:1;O	C40 H77 O11 P	764.519	11.194	763.511
Perfluorooctanoic acid (PFOA)	C8 H F15 O2	413.974	6.887	412.967
3-Methylglutaric acid	C6 H10 O4	146.058	3.403	145.051
PG O-15:0_16:1	C37 H73 O9 P	692.513	10.694	691.505
LPG 16:1	C22 H43 O9 P	482.264	8.989	481.257
2,2-Bis(hydroxymethyl)propionic acid	C5 H10 O4	134.058	2.339	133.051
PA 14:0_16:1	C33 H63 O8 P	618.426	11.782	617.419
N-Acetyl-DL-tryptophan	C13 H14 N2 O3	246.104	5.545	245.097
LPG 18:1	C24 H47 O9 P	510.296	10.444	509.288
5-Phenylvaleric Acid	C11 H14 O2	178.1	6.687	223.098
LPS 17:0	C23 H46 N O9 P	511.291	9.532	510.284
Acetyl-CoA	C23 H38 N7 O17 P3 S	809.126	5.335	808.119
Cytidine-5'-monophosphate	C9 H14 N3 O8 P	323.052	1.467	322.045
DLCL 16:1_24:4	C49 H88 O15 P2	978.57	9.065	977.563
JWH 250 N-pentanoic acid metabolite	C22 H23 N O4	365.162	4.834	364.155
Hexadecanedioic acid	C16 H30 O4	286.215	6.62	285.207
15-OxoEDE	C20 H34 O3	368.271	9.807	367.264
3'-Dephosphocoenzyme A	C21 H35 N7 O13 P2 S	343.575	4.943	686.142
Flavin adenine dinucleotide (FAD)	C27 H33 N9 O15 P2	785.157	5.12	784.15
4-Methoxycinnamic Acid	C10 H10 O3	178.063	5.641	223.061
PMeOH 16:0_18:1	C38 H73 O8 P	688.496	9.485	687.489
Lysopc 14:0	C22 H46 N O7 P	467.301	9.706	466.294
Lipoic acid	C8 H14 O2 S2	206.043	2.242	205.036
N alpha-Acetyl-L-Arginine	C8 H16 N4 O3	216.123	1.695	215.115
Hippuric acid	C9 H9 N O3	179.057	3.403	357.106
6-Thioinosine-phosphate	C10 H13 N4 O7 P S	364.029	2.229	363.021
LPS 22:4	C28 H48 N O9 P	573.304	9.751	572.297
2'-Deoxyguanosine 5'-monophosphate (dGMP)	C10 H14 N5 O7 P	347.064	0.528	346.056
(+/-)12(13)-DiHOME	C18 H34 O4	296.235	7.892	295.228
LPE O-5:0	C10 H24 N O6 P	285.133	1.542	284.125
AICA ribonucleotide	C9 H15 N4 O8 P	338.064	1.644	675.122
4-(4-nitrophenylazo)aniline	C12 H10 N4 O2	242.081	6.382	241.074
FAHFA 18:1/18:2	C36 H64 O4	560.478	10.522	559.47
LPE 18:0	C23 H48 N O7 P	481.317	10.104	480.309
Trehalose	C12 H22 O11	342.117	1.396	341.109
L-Methionine sulfone	C5 H11 N O4 S	181.041	4.978	180.034
LPE 20:4	C25 H44 N O7 P	501.286	8.888	500.279
Adenine	C5 H5 N5	135.055	3.768	134.048
5'-Deoxy-5'-(Methylthio)Adenosine	C11 H15 N5 O3 S	297.09	5.249	342.088
2'-Deoxyinosine	C10 H12 N4 O4	252.086	4.639	251.079
LPE 14:0	C19 H40 N O7 P	425.254	8.409	424.247
Kaempferitrin	C27 H30 O14	624.171	9.158	623.163
N-(2,5-diethoxy-4-morpholinophenyl)-4-methoxybenzenesulfonamide	C21 H28 N2 O6 S	436.169	2.262	435.162
2-Methylpentanedioic acid	C6 H10 O4	146.058	2.439	127.04
Levulinic acid	C5 H8 O3	116.047	3.961	115.04
dATP	C10 H16 N5 O12 P3	491	1.535	489.993
Guanosine triphosphate (GTP)	C10 H16 N5 O14 P3	522.991	1.615	521.984
Glyceraldehyde 3-phosphate diethyl acetal	C7 H15 Ba O7 P	379.96	1.423	378.953
Sebacic acid	C10 H18 O4	202.121	6.171	201.114
(±)18-HEPE	C20 H30 O3	318.22	7.74	317.212
LPS 16:1	C22 H42 N O9 P	495.26	7.988	494.253
Quinic acid	C7 H12 O6	192.064	4.134	191.056
PE 14:0_17:1	C36 H70 N O8 P	675.484	10.166	674.477
D-Glucosamine 6-phosphate	C6 H14 N O8 P	259.046	1.24	258.039
Glu-Glu	C10 H16 N2 O7	276.096	1.532	275.089
6-chloro-2-methyl-4-[(2,3,4,5,6-pentamethylbenzyl)oxy]quinoline	C22 H24 Cl N O	353.158	5.231	352.151
PG 14:0_14:0	C34 H67 O10 P	666.447	11.545	665.44
α-D-Glucose-1,6-bisphosphate	C6 H14 O12 P2	339.996	1.188	338.989
4-Pyridoxic acid	C8 H9 N O4	183.054	5.422	182.046
NADH	C21 H29 N7 O14 P2	665.124	4.631	664.117
PE O-20:4_17:1	C42 H76 N O7 P	737.522	9.409	736.514
CerP 14:1;2O/2:0	C16 H32 N O6 P	365.195	5.333	364.188
Asp-Phe methyl ester	C14 H18 N2 O5	294.122	5.393	293.115
5-Phosphoribosyl 1-pyrophosphate	C5 H13 O14 P3	389.95	1.261	426.899
LNAPE 14:0/N-14:0	C33 H66 N O8 P	635.452	11.117	634.445
Dimetghyl 4-Hydroxyisophthalate	C10 H10 O5	210.054	5.557	209.046
Thromboxane B1	C20 H36 O6	426.238	9.093	407.22
N-acetyl-D-glucosamine	C8 H15 N O6	221.09	1.505	202.072
LPA 16:0	C19 H39 O7 P	410.243	10.406	409.236
Ethyl chrysanthemumate	C12 H20 O2	196.147	6.354	241.145
D-Mannitol 1-phosphate	C6 H15 O9 P	262.046	1.547	261.038
Isorhapontigenin	C15 H14 O4	258.085	3.993	257.078
LPS 18:1	C24 H46 N O9 P	523.291	8.946	522.283
MGDG O-10:0_14:0	C33 H64 O9	664.487	10.368	663.48
Pyridoxal-5'-phosphate	C8 H10 N O6 P	247.025	2.486	246.017
(3R)-8-hydroxy-3-(4-methoxyphenyl)-3,4-dihydro-1H-2-benzopyran-1-one	C16 H14 O4	270.086	3.66	269.079
PG O-14:1_16:1	C36 H69 O9 P	676.466	9.707	675.459
6α-Prostaglandin I1	C20 H34 O5	354.241	7.071	353.234
L-(-)-Glyceric acid	C3 H6 O4	106.027	1.463	105.019
3-(1-cyano-1,2-dihydroisoquinolin-2-yl)-3-oxopropyl propionate	C16 H16 N2 O3	284.12	6.142	283.113
LPE O-3:0	C8 H20 N O6 P	211.096	1.517	256.094
Choline Glycerophosphate	C8 H20 N O6 P	257.102	1.666	256.094
3-Indoleacrylic acid	C11 H9 N O2	187.064	5.629	186.056
5-[(Benzoyloxy)methyl]-4,5,6-trihydroxy-2-cyclohexen-1-yl benzoate	C21 H20 O7	384.122	2.798	383.114
PMeOH 14:0_16:1	C34 H65 O8 P	632.442	8.229	631.435
Thymidine	C10 H14 N2 O5	242.09	4.888	287.089
Dl-Glyceraldehyde3-phosphate	C3 H7 O6 P	169.999	1.252	168.991
S-Sulfo-L-cysteine	C3 H7 N O5 S2	200.977	1.555	199.97
3-Hydroxypicolinic acid	C6 H5 N O3	139.027	5.481	138.02
Reduced glutathione	C10 H17 N3 O6 S	307.092	3.366	342.061
5-Aminovaleric acid	C5 H11 N O2	117.079	1.706	116.072
LPG 16:0	C22 H45 O9 P	484.28	10.039	483.273
LNAPE 16:0/N-3:0	C24 H48 N O8 P	509.311	9.293	508.304
LPS 20:1	C26 H50 N O9 P	551.322	10.046	550.315
UMP	C9 H13 N2 O9 P	324.036	6.347	323.029
Xanthohumol	C21 H22 O5	354.15	9.68	353.143
Succinic acid	C4 H6 O4	118.027	2.593	117.019
LPC 18:2	C26 H50 N O7 P	565.338	8.734	564.331
L-Malate	C4 H6 O5	134.022	2.916	133.015
Citicoline	C14 H26 N4 O11 P2	488.106	5.574	487.099
LPE 20:1	C25 H50 N O7 P	507.333	10.284	506.325
LPS 16:0	C22 H44 N O9 P	497.276	8.645	534.226
Nicotinamide N-oxide	C6 H6 N2 O2	138.043	2.208	183.041
trans-Cinnamic acid	C9 H8 O2	148.053	5.685	147.045
PG 14:0_14:1	C34 H65 O10 P	664.432	8.017	663.425
LNAPE 16:1/N-10:0	C31 H60 N O8 P	605.406	11.426	604.398
LPA 17:1	C20 H39 O7 P	422.243	9.943	421.236
10-Nitrolinoleate	C18 H31 N O4	325.226	6.301	324.218
Sedoheptulose 1,7-bisphosphate	C7 H16 O13 P2	370.007	1.186	369
N-(4-chlorophenethyl)-1-adamantanecarboxamide	C19 H24 Cl N O	317.159	5.194	316.151
LPG 12:0	C18 H37 O9 P	428.217	7.565	427.21
2-Isopropylmalic acid	C7 H12 O5	176.069	5.451	175.062
LPS 20:4	C26 H44 N O9 P	545.273	8.706	544.266
Lysope 18:1	C23 H46 N O7 P	479.301	11.291	478.293
Soyasaponin I	C48 H78 O18	942.522	6.92	941.515
2-Isopropylmalate	C7 H12 O5	176.069	3.779	175.061
dCDP	C9 H15 N3 O10 P2	387.024	1.773	386.017
19(R)-Hydroxy prostaglandin F2α	C20 H34 O6	370.236	6.198	369.229
(2S)-4-Oxo-2-phenyl-3,4-dihydro-2H-chromen-7-yl beta-D-glucopyranoside	C21 H22 O8	448.142	6.976	447.135
12(S)-HETE	C20 H32 O3	320.235	8.386	319.228
Glu-Gln	C10 H17 N3 O6	275.112	1.515	274.105
Phenylacetaldehyde	C8 H8 O	120.058	5.688	119.05
Methyl-2-hydroxyisobutyric acid	C5 H10 O3	118.052	4.483	117.045
Homo-Gamma-Linolenic Acid (C20:3)	C20 H34 O2	306.256	10.274	305.249
PA 16:1_16:1	C35 H65 O8 P	644.443	10.216	643.435
D-Xylulose 5-phosphate	C5 H11 O8 P	230.019	1.445	229.012
N1-(2-methyl-4-nitrophenyl)acetamide	C9 H10 N2 O3	176.059	2.453	175.052
6-Keto-prostaglandin f1alpha	C20 H34 O6	370.236	6.493	369.229
PA 14:0_14:0	C31 H61 O8 P	592.411	11.54	591.404
LPA 12:0	C15 H31 O7 P	354.181	7.868	353.174
UDP-N-acetylglucosamine	C17 H27 N3 O17 P2	112.027	1.788	111.02
CTP	C9 H16 N3 O14 P3	482.984	1.586	481.977
Adenosine 3'5'-cyclic monophosphate	C10 H12 N5 O6 P	329.053	2.316	328.045
Dihydroxyacetone phosphate	C3 H7 O6 P	169.998	1.527	168.991
Citric acid	C6 H8 O7	192.027	2.028	191.02
PE 12:0_17:1	C34 H66 N O8 P	647.452	10.929	646.445
15-Keto prostaglandin A1	C20 H30 O4	334.215	6.727	333.207
Isobutyryl carnitine	C11 H21 N O4	231.148	5.589	230.14
N1-[4-(cyanomethyl)phenyl]-4-chlorobenzamide	C15 H11 Cl N2 O	270.054	6.678	269.046
4-Acetamidobutyric Acid	C6 H11 N O3	145.074	2.223	144.067
L-Arabinitol	C5 H12 O5	152.069	2.159	133.051
Narasin	C43 H72 O11	764.521	7.672	763.513
13,14-dihydro-15-keto-tetranor Prostaglandin E2	C16 H26 O5	280.165	7.008	279.158
8,8'-dicarboxy-1,1'-binaphthalene	C22 H14 O4	342.092	4.915	341.085
LNAPE 12:0/N-4:0	C21 H42 N O8 P	467.265	7.622	466.257
(+/-)9,10-dihydroxy-12Z-octadecenoic acid	C18 H34 O4	314.246	6.928	313.239
Dimethylallyl pyrophosphate	C5 H12 O7 P2	246.006	2.418	244.999
LPE 15:1	C20 H40 N O7 P	874.504	8.254	436.245
o-Toluic Acid	C8 H8 O2	136.052	1.764	135.045
Adrenic acid	C22 H36 O2	332.271	10.558	331.264
L-Ascorbate	C6 H8 O6	176.032	1.187	211.002
Uridine	C9 H12 N2 O6	244.07	2.247	243.062
Flavin Adenine Dinucleotide	C27 H33 N9 O15 P2	785.156	3.386	784.149
Vitamin B2	C17 H20 N4 O6	376.138	9.45	421.135
Riboflavin	C17 H20 N4 O6	376.138	5.372	375.131
3-(2-Naphthyl)-D-Alanine	C13 H13 N O2	215.095	6.419	214.088
DLCL 18:1_24:4	C51 H92 O15 P2	1006.6	10.402	1005.6
dTMP	C10 H15 N2 O8 P	322.057	1.741	321.05
13,14-Dihydro-15-keto Prostaglandin A2	C20 H30 O4	370.189	7.19	369.182
N-Acetyl-DL-glutamic acid	C7 H11 N O5	189.064	2.211	188.057
16-Hydroxyhexadecanoic acid	C16 H32 O3	254.225	9.68	253.217
Pantethine	C22 H42 N4 O8 S2	554.244	5.799	553.237
Lysope 16:0	C21 H44 N O7 P	453.285	11.671	452.278
2,3,4-Trihydroxybenzoic acid	C7 H6 O5	170.022	3.057	169.015
MGDG O-26:6_17:1	C52 H88 O9	916.671	10.234	915.663
5-Methoxyindoleacetic acid	C11 H11 N O3	205.078	5.556	204.07
PG 12:0_14:0	C32 H63 O10 P	592.41	11.119	637.408
2-(Dimethylamino)Guanosine	C12 H17 N5 O5	311.122	3.822	310.115
2-[(carboxymethyl)(methyl)amino]-5-methoxybenzoic acid	C11 H13 N O5	239.077	5.343	238.07
N2-Methylguanosine	C11 H15 N5 O5	297.107	4.866	296.1
CUMYL-PICA N-pentanoic acid metabolite	C23 H26 N2 O3	378.194	8.13	377.186
5,6-Dihydroxyindole-2-Carboxylic Acid	C9 H7 N O4	193.038	5.689	192.03
dADP	C10 H15 N5 O9 P2	411.034	2.424	410.026
MGDG O-8:0_16:1	C33 H62 O9	662.473	11.37	661.465
Histamine	C5 H9 N3	111.08	1.316	110.073
L-arginine	C6 H14 N4 O2	174.112	1.334	173.105
4-Hydroxybutyric acid (GHB)	C4 H8 O3	104.048	2.362	103.04
Lauric acid ethyl ester	C14 H28 O2	228.209	8.21	227.202
D-Phenylalanine	C9 H11 N O2	165.079	1.393	164.072
Azelaic acid	C9 H16 O4	188.105	5.833	187.098
Traumatic acid	C12 H20 O4	228.137	6.321	227.129
Oxaceprol	C7 H11 N O4	173.069	2.652	218.067
LPS 18:0	C24 H48 N O9 P	525.306	9.768	524.299
PG 14:0_16:2	C36 H67 O10 P	690.448	8.371	689.44
LysoPE 18:2	C23 H44 N O7 P	477.284	9.261	476.278
PE O-20:5_18:1	C43 H76 N O7 P	749.522	7.315	748.514
(±)11-HETE	C20 H32 O3	320.235	8.133	319.228
2'-Deoxyadenosine 5'-monophosphate (dAMP)	C10 H14 N5 O6 P	331.068	1.978	330.061
LNAPE 16:1/N-17:0	C38 H74 N O8 P	703.518	9.031	702.511
ADP-ribose	C15 H23 N5 O14 P2	559.072	2.472	558.064
2'-Deoxycytidine 5'-monophosphate (dCMP)	C9 H14 N3 O7 P	307.057	1.515	306.05
Deoxycytidine	C9 H13 N3 O4	227.091	5.327	272.089
N-Acetyl-L-histidine	C8 H11 N3 O3	197.08	1.565	196.073
Lysopa 16:0	C19 H39 O7 P	410.243	10.851	409.236
DL-Norvaline	C5 H11 N O2	117.079	5.353	116.072
Nicotinuric Acid	C8 H8 N2 O3	180.054	4.998	225.052
Adenosine 5'-monophosphate	C10 H14 N5 O7 P	347.063	1.637	346.056
2-Hydroxyvaleric acid	C5 H10 O3	118.063	5.33	117.056
Asaraldehyde	C10 H12 O4	196.073	3.047	391.136
2-Furoic acid	C5 H4 O3	112.016	4.922	111.009
(R)-3-Hydroxy myristic acid	C14 H28 O3	244.204	8.232	243.197
LPE 18:1	C23 H46 N O7 P	479.301	9.48	478.293
3-Hydroxydecanoic acid	C10 H20 O3	188.142	6.668	187.134
5-(tert-butyl)-2-methyl-N-(5-methyl-3-isoxazolyl)-3-furamide	C14 H18 N2 O3	262.132	5.289	261.125
Thymidine 5'-monophosphate	C10 H15 N2 O8 P	322.057	2.216	321.049
D-Mannose 6-phosphate	C6 H13 O9 P	260.03	1.235	259.023
Oleoyl-L-α-lysophosphatidic acid	C21 H41 O7 P	436.259	10.836	435.252
Octopamine	C8 H11 N O2	153.079	5.344	152.072
Uridine 5'-diphosphogalactose	C15 H24 N2 O17 P2	566.055	1.566	565.048
Gentisic acid	C7 H6 O4	154.027	5.478	153.02
Arachidonic acid	C20 H32 O2	304.24	9.873	303.233
Adenosine triphosphate (ATP)	C10 H16 N5 O13 P3	506.995	2.526	505.988
LPS 19:1	C25 H48 N O9 P	537.307	9.643	536.299
Quinolinic acid	C7 H5 N O4	167.022	1.834	166.015
Ethyl myristate	C16 H32 O2	256.24	10.33	255.233
D-Xylonic Acid	C5 H10 O6	166.048	1.361	165.041
Phosphoenolpyruvic acid	C3 H5 O6 P	167.983	1.499	166.975
Uridine monophosphate (UMP)	C9 H13 N2 O9 P	324.036	1.502	323.028
AKB48 N-(4-hydroxypentyl) metabolite	C23 H31 N3 O2	417.223	4.819	416.215
PE 14:0_16:1	C35 H68 N O8 P	661.469	11.377	660.461
Malic acid	C4 H6 O5	134.022	2.24	133.015
2-Hydroxybutyric acid	C4 H8 O3	104.048	3.641	103.04
(±)11(12)-EET	C20 H32 O3	320.235	8.055	319.228
Nicotinamide adenine dinucleotide phosphate	C21 H28 N7 O17 P3	743.076	1.48	742.069
8-iso-15-keto Prostaglandin F2α	C20 H32 O5	388.196	5.215	387.189
L-Dopa	C9 H11 N O4	197.069	5.766	196.062
LNAPE 16:1/N-2:0	C23 H44 N O8 P	493.28	8.801	492.273
LNAPE 14:0/N-4:0	C23 H46 N O8 P	495.296	8.479	494.289
PE 16:1_18:1	C39 H74 N O8 P	715.515	11.395	714.508
Boc-beta-cyano-L-alanine	C9 H14 N2 O4	214.096	4.596	213.088
PE 14:1_16:1	C35 H66 N O8 P	659.453	10.282	658.445
Glycerophospho-N-palmitoyl ethanolamine	C21 H44 N O7 P	453.285	9.281	452.278
Malonic acid	C3 H4 O4	104.011	1.418	103.004
DL-m-Tyrosine	C9 H11 N O3	181.074	4.811	226.072
trans-2-Butene-1,4-dicarboxylic Acid	C6 H8 O4	144.043	5.309	143.035
Phosphopyruvic acid	C3 H5 O6 P	167.983	2.03	166.975
Phenylpyruvic acid	C9 H8 O3	164.048	5.51	163.04
D-(-)-Mannitol	C6 H14 O6	182.08	1.348	181.072
2,3-Bisphospho-D-glyceric acid	C3 H8 O10 P2	265.959	1.197	264.952
Prostaglandin F3α	C20 H32 O5	398.234	9.129	397.226
Glutaconic acid	C5 H6 O4	130.027	1.917	129.02
(+/-)-Equol	C15 H14 O3	242.094	5.495	483.181
N-Acetyl-DL-norvaline	C7 H13 N O3	159.09	5.354	158.083
2-Hydroxycaproic acid	C6 H12 O3	132.079	5.684	131.072
acetoacetate	C4 H6 O3	102.032	5.102	203.056
Guanosine monophosphate (GMP)	C10 H14 N5 O8 P	363.058	1.523	362.051
2-Phosphoglyceric acid	C3 H7 O7 P	185.993	1.515	184.986
5-Methyl-2'-deoxycytidine	C10 H15 N3 O4	241.107	4.962	240.099
Dodecanedioic acid	C12 H22 O4	230.152	6.458	229.145
H-Gly-Pro-OH	C7 H12 N2 O3	172.085	1.538	217.083
Υ-Aminobutyric acid (GABA)	C4 H9 N O2	103.064	1.393	102.056
Guanosine	C10 H13 N5 O5	283.092	3.471	282.084
Gamma-Caprolactone	C6 H10 O2	114.068	5.474	113.061
2-Ketoadipic acid	C6 H8 O5	160.037	2.707	159.03
6-styryl-3-phenyl-2,5-dihydro-1,2,4-triazin-5-one	C17 H13 N3 O	275.101	1.981	274.094
Verbascose	C30 H52 O26	828.275	1.5	863.244
1-(4-methylphenyl)-3-(2-pyridylthio)pyrrolidine-2,5-dione	C16 H14 N2 O2 S	299.077	3.294	298.07
Adenylosuccinic acid	C14 H18 N5 O11 P	463.074	4.003	462.067
Glutathione	C10 H17 N3 O6 S	307.084	1.421	306.077
LPE 12:0	C17 H36 N O7 P	397.223	7.566	396.216
Toradol	C15 H13 N O3	255.086	4.942	254.078
Glycerol 3-phosphate	C3 H9 O6 P	172.014	1.255	171.007
LPG 17:1	C23 H45 O9 P	496.28	9.884	495.273
LPE 17:1	C22 H44 N O7 P	465.285	9.18	464.278
cis-Aconitic acid	C6 H6 O6	174.017	2.063	173.009
Pseudouridine	C9 H12 N2 O6	244.07	1.663	243.062
1,4-Dihydro-1-Methyl-4-Oxo-3-Pyridinecarboxamide	C7 H8 N2 O2	152.059	5.524	197.057
2'-Deoxyinosine 5'-monophosphate	C10 H13 N4 O7 P	332.051	1.609	331.044
Flavin mononucleotide (FMN)	C17 H21 N4 O9 P	456.105	5.259	455.097
LNAPE 16:1/N-4:0	C25 H48 N O8 P	521.312	8.706	520.304
Chenodeoxycholic Acid	C24 H40 O4	438.298	7.94	437.291
Xanthosine	C10 H12 N4 O6	284.076	4.092	283.069
Tyrosylalanine	C12 H16 N2 O4	252.111	5.052	251.104
D-Fructose 6-phosphate	C6 H13 O9 P	260.03	6.558	296.978
Chrysin	C15 H10 O4	254.058	6.603	253.051
N-acetyl-L-ornithine	C7 H14 N2 O3	174.101	1.559	173.093
D-Proline	C5 H9 N O2	115.064	5.118	114.056
PG 16:0_18:1	C40 H77 O10 P	748.52	11.53	747.513
2-(4-chlorophenoxy)-N-(2-oxo-3-azepanyl)nicotinamide	C18 H18 Cl N3 O3	359.099	1.538	358.091
2,3-Dinor-8-epi-prostaglandin F2α	C18 H30 O5	326.21	6.633	325.202
3-Phosphoglyceric acid	C3 H7 O7 P	185.993	1.252	184.986
4-Hydroxyisoleucine	C6 H13 N O3	147.09	5.087	146.082
α-Estradiol	C18 H24 O2	272.174	5.764	271.167
3-Hydroxybenzoic acid	C7 H6 O3	138.032	5.91	137.025
MGDG O-24:6_16:1	C49 H82 O9	874.625	9.679	873.618
N-Acetyl-L-methionine	C7 H13 N O3 S	191.062	5.307	190.055
N-Acetyl-DL-phenylalanine	C11 H13 N O3	207.09	2.366	252.088
α-Aspartylphenylalanine	C13 H16 N2 O5	280.106	5.145	279.099
LNAPE 18:1/N-4:0	C27 H52 N O8 P	549.343	9.544	548.336
D-Ribose	C5 H10 O5	150.053	1.402	149.046
FAHFA 16:1/18:3	C34 H58 O4	530.431	9.679	529.424
Deoxyadenosine diphosphate (dADP)	C10 H15 N5 O9 P2	411.034	1.534	410.027
Guanosine 5'-diphosphate (GDP)	C10 H15 N5 O11 P2	443.025	2.065	442.017
Docosahexaenoic Acid	C22 H32 O2	328.24	9.782	327.233
Elaidic acid	C18 H34 O2	282.256	10.52	281.249
4-Chlorophenol	C6 H5 Cl O	128.005	3.39	126.997
4-Acetamidobutanoic acid	C6 H11 N O3	145.074	1.505	144.067
Neopterin	C9 H11 N5 O4	253.081	6.243	252.074
N-Acetylglucosamine 1-phosphate	C8 H16 N O9 P	301.057	1.246	300.049
Mycophenolic acid	C17 H20 O6	320.124	5.688	319.116
4-Methylvaleric Acid	C6 H12 O2	116.084	5.398	115.077
12-Hydroxydodecanoic acid	C12 H24 O3	216.173	7.387	215.166
3-Phenyllactic acid	C9 H10 O3	166.063	5.689	165.056
N-benzyl-3-(4-chlorophenyl)-4,5-dihydro-5-isoxazolecarboxamide	C17 H15 Cl N2 O2	314.086	2.106	313.079
Indoxylsulfuric acid	C8 H7 N O4 S	213.01	5.297	212.003
Pidotimod	C9 H12 N2 O4 S	244.052	5.538	243.045
Methyl alpha-D-glucopyranoside	C7 H14 O6	194.079	2.153	231.028
aminoimidazole carboxamide ribonucleotide	C9 H15 N4 O8 P	338.062	1.487	319.044
D-(-)-Quinic acid	C7 H12 O6	192.063	2.189	191.056
LPE 19:1	C24 H48 N O7 P	493.317	10.019	492.31
P-Coumaric acid	C9 H8 O3	164.048	2.293	163.04
5-Hydroxytryptophan	C11 H12 N2 O3	220.085	3.779	219.078
LPE 16:1	C21 H42 N O7 P	451.27	9.022	450.263
LNAPE 14:1/N-4:0	C23 H44 N O8 P	493.28	7.893	492.273
Rutin	C27 H30 O16	610.154	5.489	609.146
N6-Succinyl Adenosine	C14 H17 N5 O8	383.108	5.04	382.101
MGDG O-8:0_17:1	C34 H64 O9	676.487	10.177	675.48
PE 14:0_16:0	C35 H70 N O8 P	663.484	10.533	662.477
D-(-)-Fructose	C6 H12 O6	180.064	1.417	179.056
CDP	C9 H15 N3 O11 P2	403.017	1.486	402.01
FAHFA 18:0/20:2	C38 H70 O4	590.525	11.166	589.517
LPC 18:1	C26 H52 N O7 P	567.354	9.544	548.336
Adenosine diphosphate ribose	C15 H23 N5 O14 P2	559.072	1.43	558.064
FAHFA 16:0/18:2	C34 H62 O4	534.462	10.33	533.455
1a,1b-Dihomo prostaglandin F2α	C22 H38 O5	372.238	5.355	417.236
Deoxyribose 5-Phosphate	C5 H11 O7 P	214.024	3.953	213.017
LNAPE 16:0/N-4:0	C25 H50 N O8 P	523.327	9.348	522.32
D-α-Hydroxyglutaric acid	C5 H8 O5	148.037	1.918	147.03
Reduced nicotinamide adenine dinucleotide	C21 H29 N7 O14 P2	665.125	2.204	664.117
2-Arachidonyl Glycerol ether	C23 H40 O3	400.269	5.537	399.262
4,5-Dicaffeoylquinic acid	C25 H24 O12	470.132	5.065	515.129
N4-Acetylcytidine	C11 H15 N3 O6	285.098	2.274	284.09
4-Methyl-2-Oxopentanoic Acid	C6 H10 O3	130.063	5.456	129.056
FAHFA 17:1/18:2	C35 H62 O4	546.462	10.277	545.455
Feruloyl Putrescine	C14 H20 N2 O3	264.147	5.374	263.14
D-Glucose 6-phosphate	C6 H13 O9 P	214.025	1.24	259.023
7-Ketolithocholic acid	C24 H38 O4	390.277	7.107	389.27
Tretinoin	C20 H28 O2	300.209	9.008	299.202
2-Amino-3-(4-hydroxy-3-methoxyphenyl)propanoic acid	C10 H13 N O4	211.085	3.732	210.077
Guanosine-3',5'-cyclic monophosphate	C10 H12 N5 O7 P	690.096	4.661	344.041
Xanthine	C5 H4 N4 O2	152.034	2.148	151.026
Ethylmalonate	C5 H8 O4	132.042	2.172	131.035
Hypoxanthine	C5 H4 N4 O	136.039	2.006	135.031
Indole-3-lactic acid	C11 H11 N O3	205.074	5.621	204.067
Inosine-5'-monophosphate (IMP)	C10 H13 N4 O8 P	348.048	1.536	347.04
Methionine	C5 H11 N O2 S	149.051	1.956	148.044
N1-[4-(aminosulfonyl)phenyl]-2,2-dimethylpropanamide	C11 H16 N2 O3 S	256.089	5.784	255.081
D-(+)-Malic acid	C4 H6 O5	134.022	1.532	133.015
LNAPE 16:1/N-3:0	C24 H46 N O8 P	507.296	8.682	506.289
1,5,8-Trihydroxy-9-oxo-9H-xanthen-3-yl beta-D-glucopyranoside	C19 H18 O11	422.085	2.307	421.078
Nicotinamide adenine dinucleotide	C21 H27 N7 O14 P2	663.109	1.64	662.102
Prostaglandin F2α 1-11-lactone	C20 H32 O4	672.473	10.072	671.466
6-(Dimethylamino)purine	C7 H9 N5	163.086	5.313	162.079
Thymidine 5'-diphosphate	C10 H16 N2 O11 P2	402.023	1.525	401.016
PE O-20:5_16:0	C41 H74 N O7 P	723.507	11.121	722.5
Thr-Leu	C10 H20 N2 O4	232.142	5.164	231.135
10-Undecenoic acid	C11 H20 O2	184.147	6.321	183.139
Uridine 5'-diphosphate (UDP)	C9 H14 N2 O12 P2	404.002	1.914	402.995
11(E)-Eicosenoic Acid	C20 H38 O2	310.287	11.325	309.28
Tris(2-carboxyethyl)phosphine	C9 H15 O6 P	250.061	5.068	545.12
12-Epileukotriene B4	C20 H32 O4	372.201	5.134	371.194
(±)10(11)-EpDPA	C22 H32 O3	344.236	8.055	343.228
LNAPE 17:1/N-4:0	C26 H50 N O8 P	535.327	9.244	534.32
MGDG O-12:0_16:1	C37 H70 O9	718.529	11.328	717.522
2-deoxyglucose-6-phosphate	C6 H13 O8 P	244.035	1.492	243.028
5-amino-1-phenyl-1H-pyrazole-4-carbonitrile	C10 H8 N4	184.073	5.705	183.066
LPE 15:0	C20 H42 N O7 P	439.27	8.845	438.262
LNAPE 18:1/N-3:0	C26 H50 N O8 P	535.327	9.521	534.32
2-{2-oxo-2-[(2-oxo-3-azepanyl)amino]ethoxy}acetic acid	C10 H16 N2 O5	244.106	2	243.099
methyl 2-[(4-chlorophenyl)sulfonyl]-3-(2,4-dichlorophenyl)propanoate	C16 H13 Cl3 O4 S	405.963	5.192	404.956
N-Acetylaspartic acid	C6 H9 N O5	175.048	1.935	174.041
LNAPE 2:0/N-4:0	C11 H22 N O8 P	327.108	2.872	326.101
8-Bromoguanosine	C10 H12 Br N5 O5	361.003	3.302	359.996
S-Lactoylglutathione	C13 H21 N3 O8 S	379.105	3.296	378.098
PE 8:0_16:1	C29 H56 N O8 P	577.374	10.747	576.367
Thromoboxane B1	C20 H36 O6	408.227	9.336	407.22
5-(3-chloro-4-methylanilino)-1-methyl-1H-pyrazol-3-ol	C11 H12 Cl N3 O	237.067	1.672	236.06
PE 16:1_17:1	C38 H72 N O8 P	701.5	10.756	700.492
N1-(3-amino-4-chlorophenyl)-2-[2,4-di(tert-pentyl)phenoxy]acetamide	C24 H33 Cl N2 O2	370.221	5.203	415.219
PE 14:0_14:1	C33 H64 N O8 P	633.437	9.712	632.429
Ribulose-5-phosphate	C5 H11 O8 P	230.019	1.7	229.012
D-Ribulose 5-phosphate	C5 H11 O8 P	230.02	1.248	229.012
L-beta-Imidazolelactic acid	C6 H8 N2 O3	156.054	1.735	155.047
Oxoadipic Acid	C6 H8 O5	160.037	3.5	159.03
THC	C21 H30 O2	314.221	5.666	313.213
LPA 3:0	C6 H13 O7 P	228.04	1.557	227.033
Mevalonic acid	C6 H12 O4	148.074	4.03	147.067
(2E)-4-Hydroxy-3,7-dimethyl-2,6-octadien-1-yl beta-D-glucopyranoside	C16 H28 O7	378.183	5.195	377.175
Dl-Indole-3-lactic acid	C11 H11 N O3	205.074	5.473	250.072
s7p	C7 H15 O10 P	290.041	3.209	289.033
D-Glucono-1,5-lactone	C6 H10 O6	238.069	1.414	237.062
Monomethyl phthalate	C9 H8 O4	180.043	4.879	179.035
Riboflavin-5-phosphate	C17 H21 N4 O9 P	456.105	0.533	455.097
N-Acetyl-D-alloisoleucine	C8 H15 N O3	173.106	5.615	172.098
N-Acetylanthranilic acid	C9 H9 N O3	179.059	5.991	178.051
2-Oxoglutaric acid	C5 H6 O5	146.022	1.554	145.015
2-bromo-4-methyl-1,3-thiazole-5-carboxylic acid	C5 H4 Br N O2 S	320.947	5.284	319.94
LNAPE 17:1/N-2:0	C24 H46 N O8 P	507.296	9.325	506.289
Fumaric acid	C4 H4 O4	116.011	2.002	115.004
D-Glucosamine	C6 H13 N O5	179.08	1.372	214.049
